# Supplementary material
Source: publisher figshare collection journal article supplement (https://acs.figshare.com/ndownloader/files/3921943)

# Supporting Information to

**Radical Arylalkoxycarbonylation of 2-Isocyanobiphenyl with Carbazates: Dual C-C bond Formation towards Phenanthridine-6-carboxylates**

**Changduo Pan, Jie Han, Honglin Zhang, Chengjian Zhu\***

**State Key Laboratory of Coordination Chemistry, School of Chemistry and Chemical Engineering, Nanjing University, Nanjing, 210093, China**

*E-mail: cjzhu@nju.edu.cn*

# Copies of product $^1\text{H}$ NMR, $^{13}\text{C}$ NMR and $^{19}\text{F}$ NMR

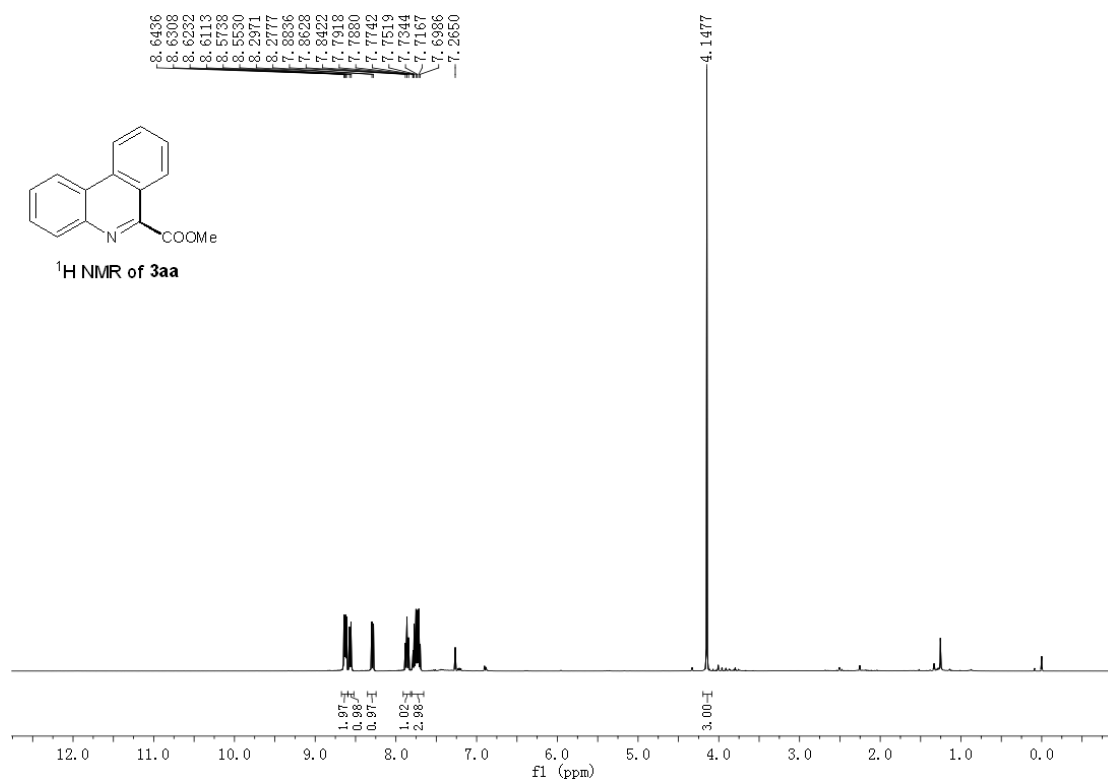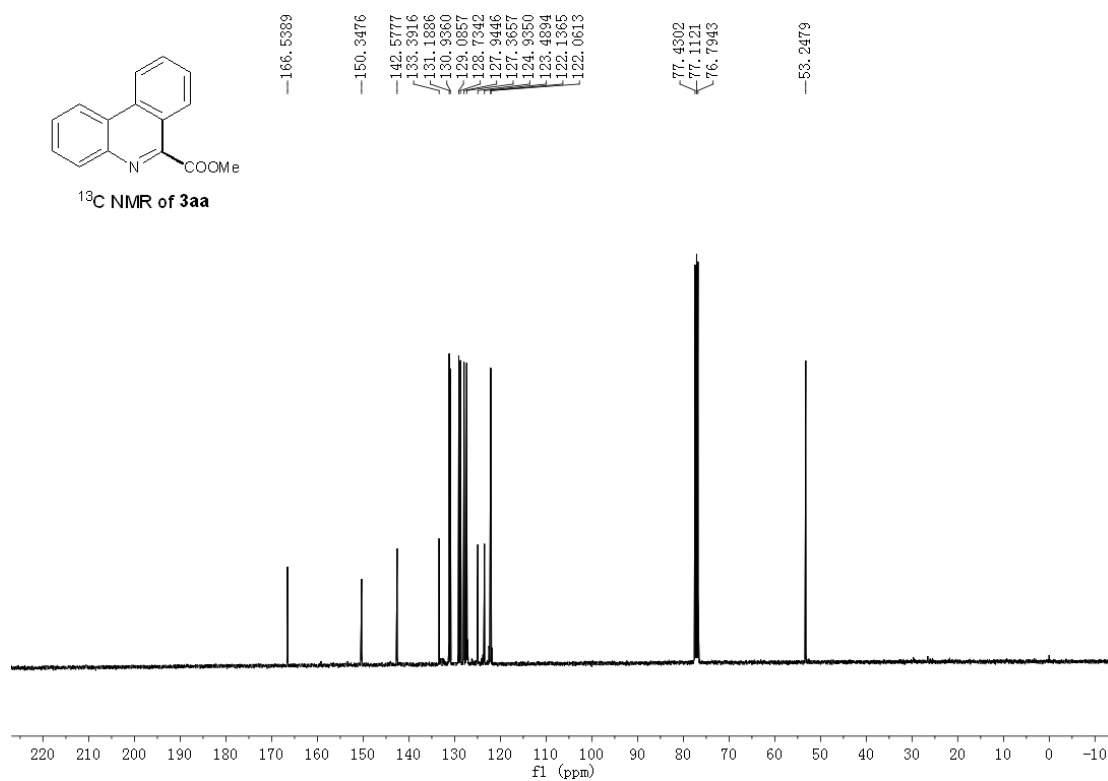

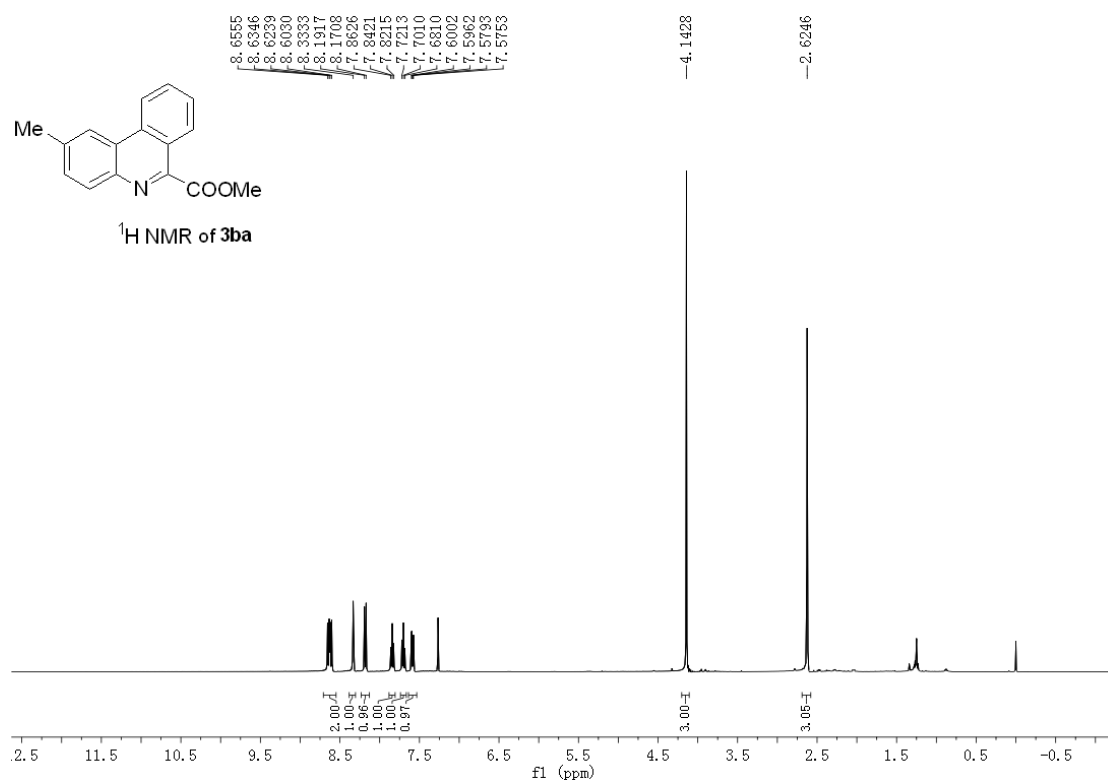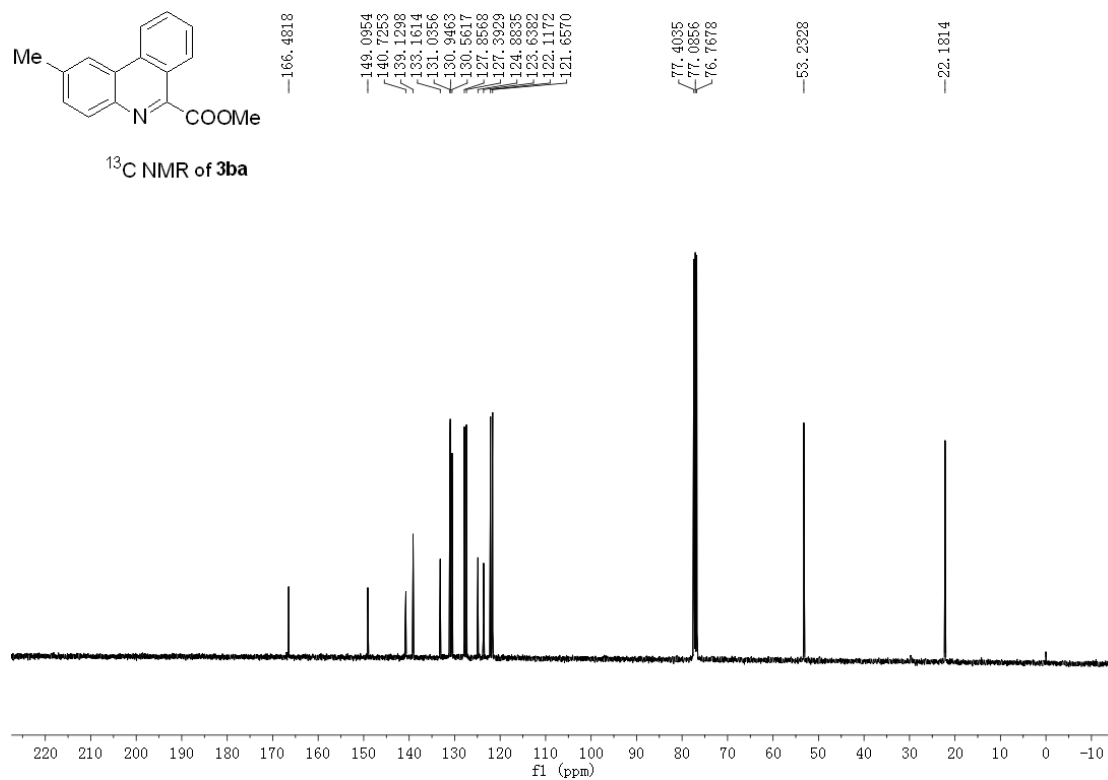

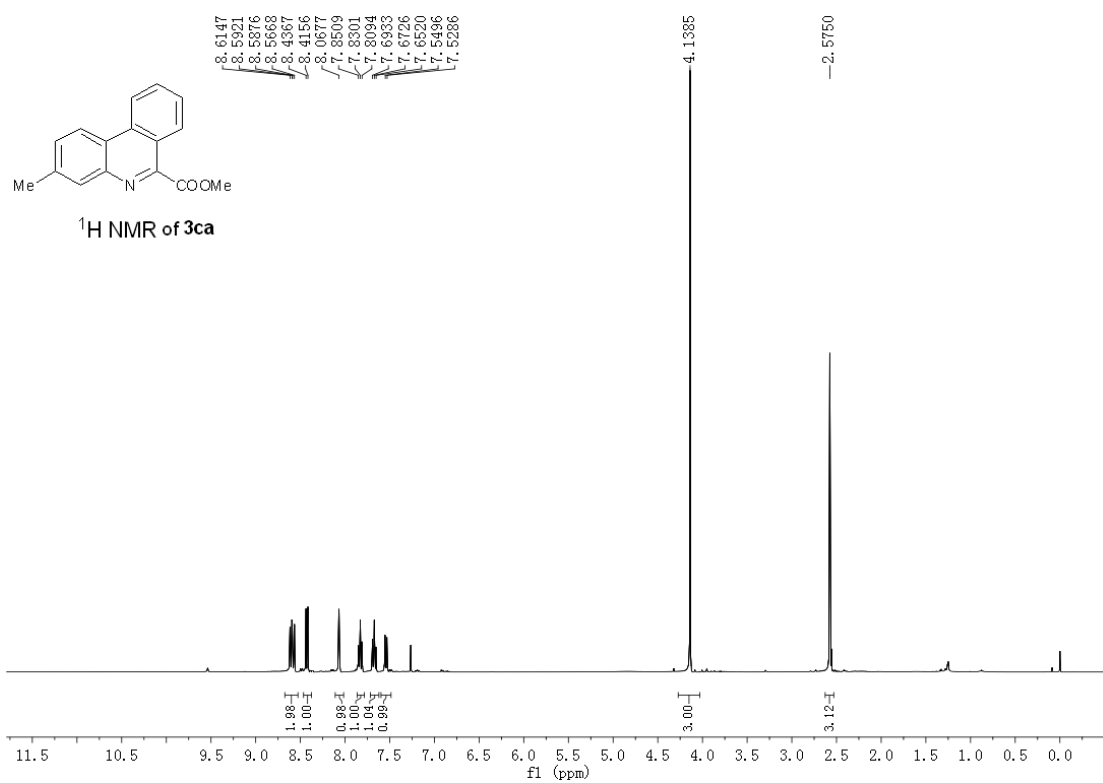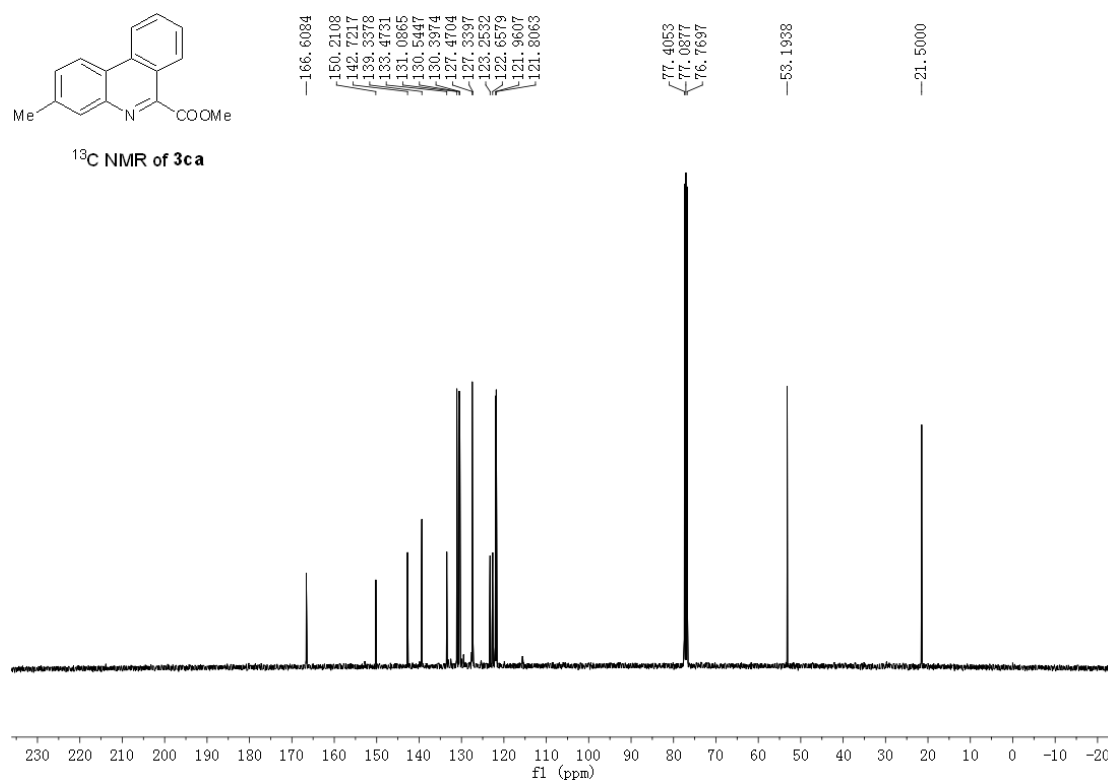

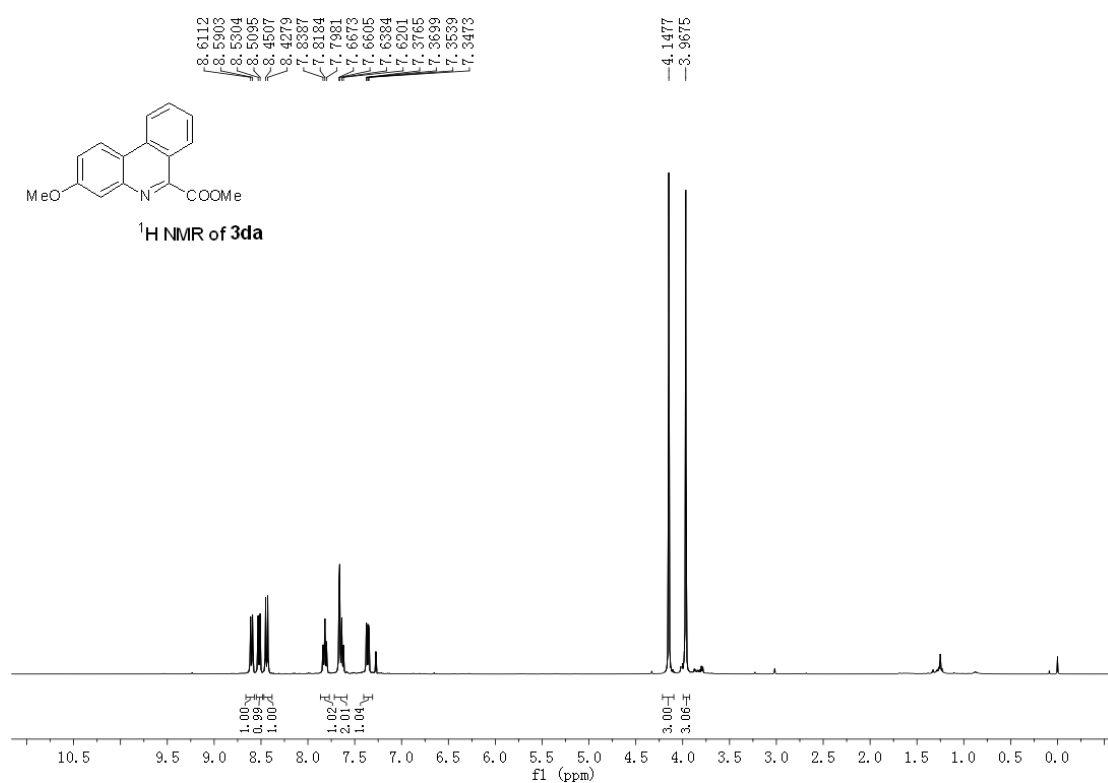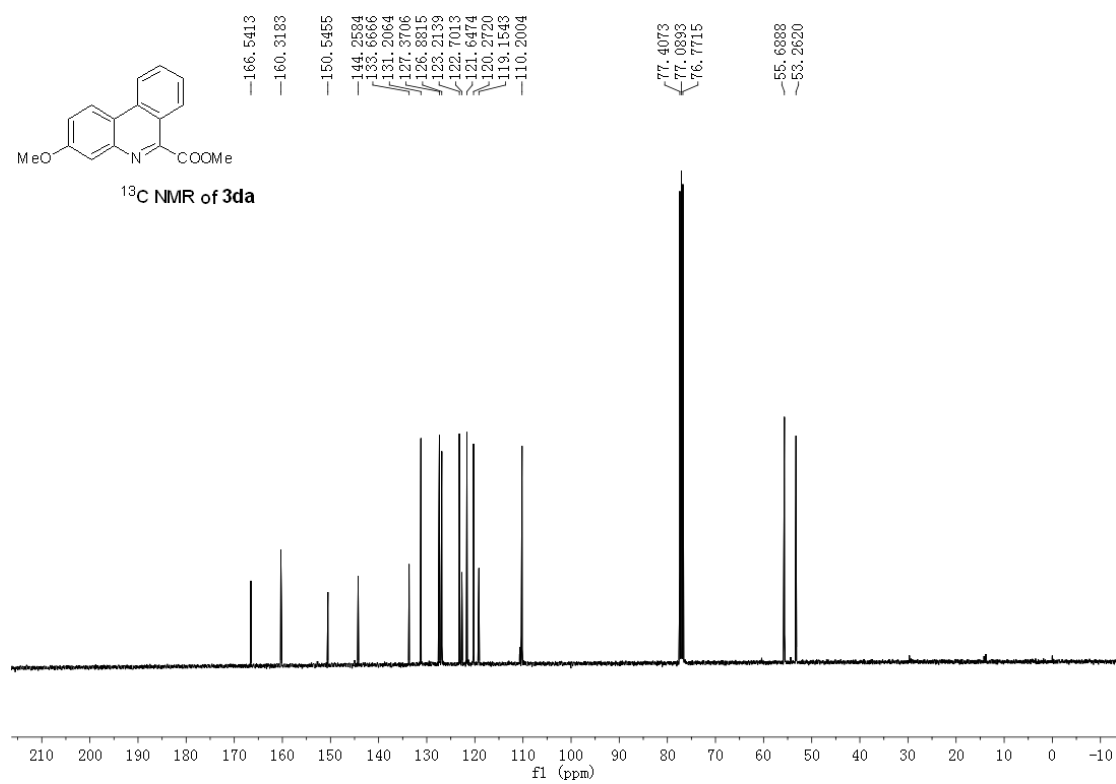

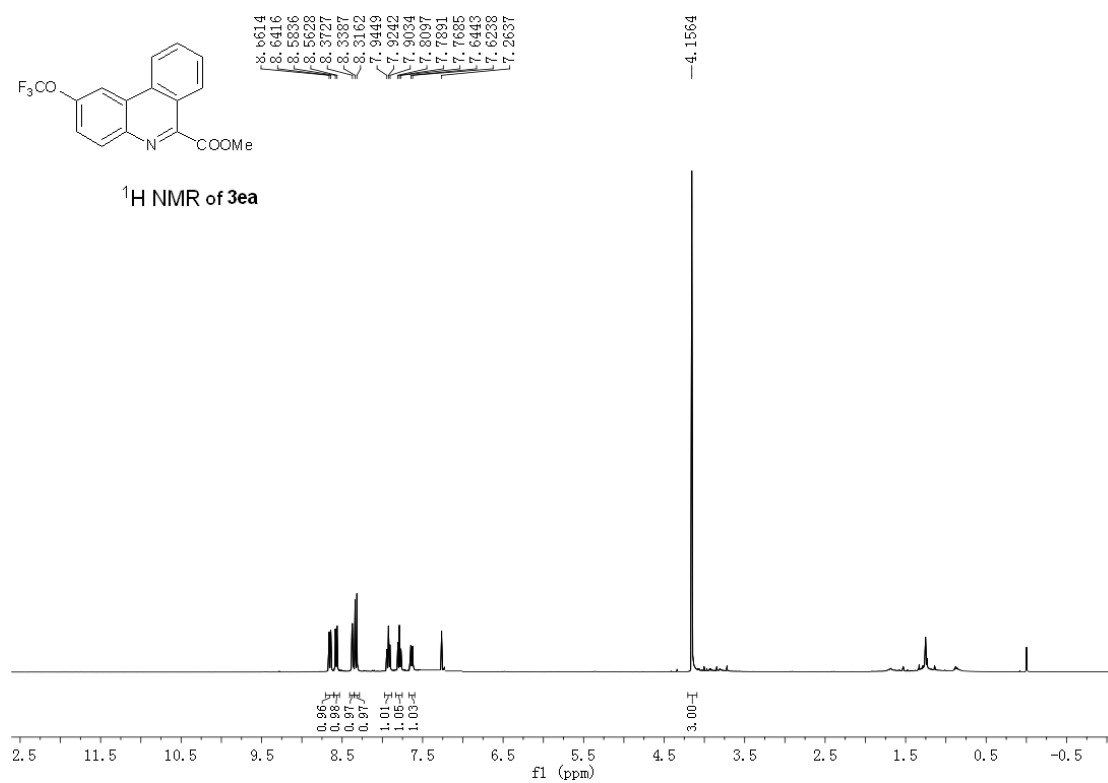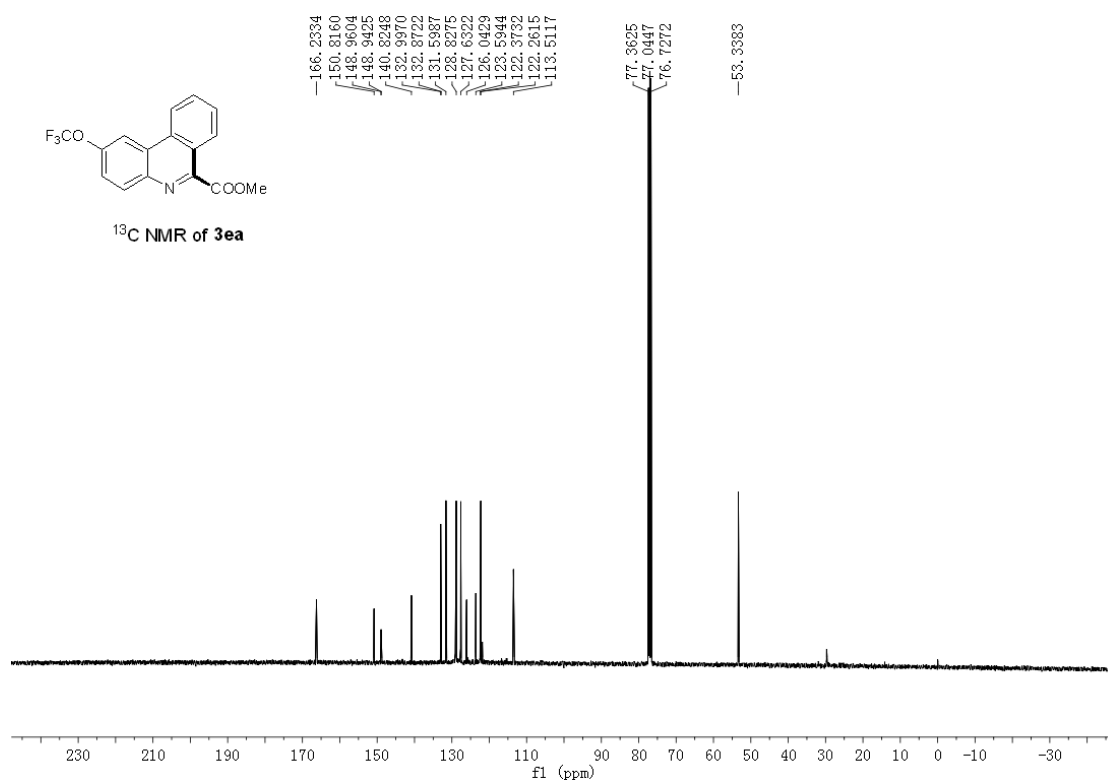

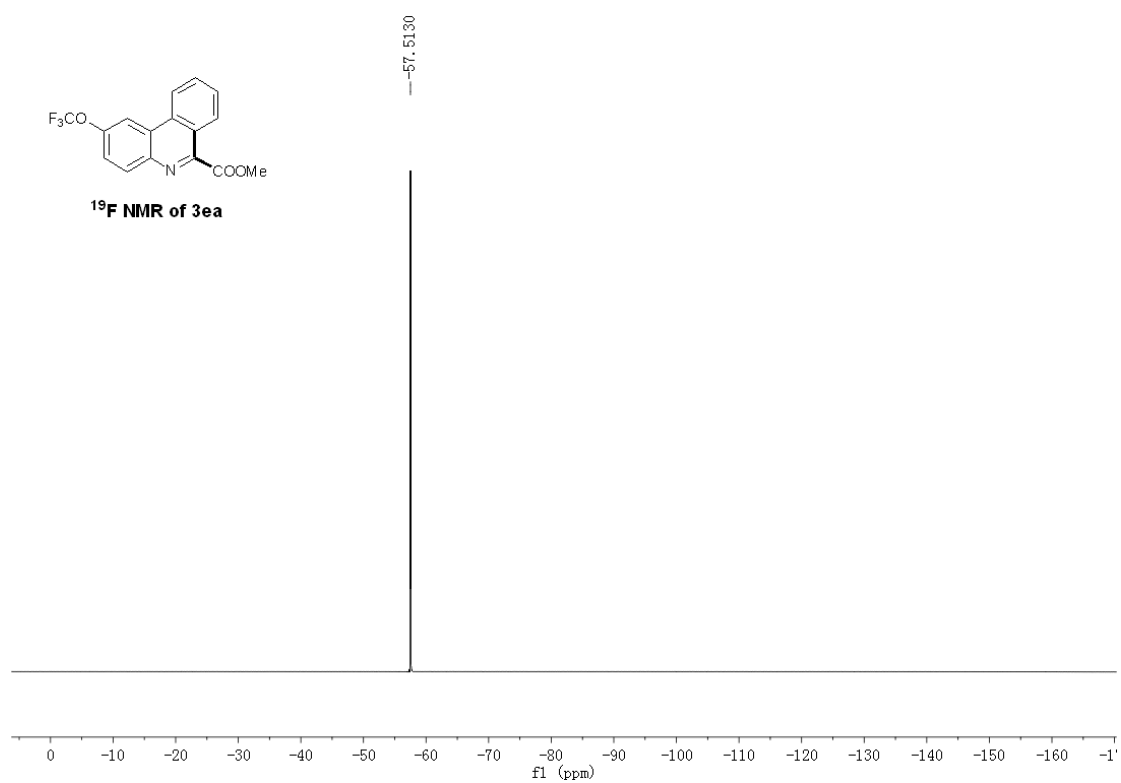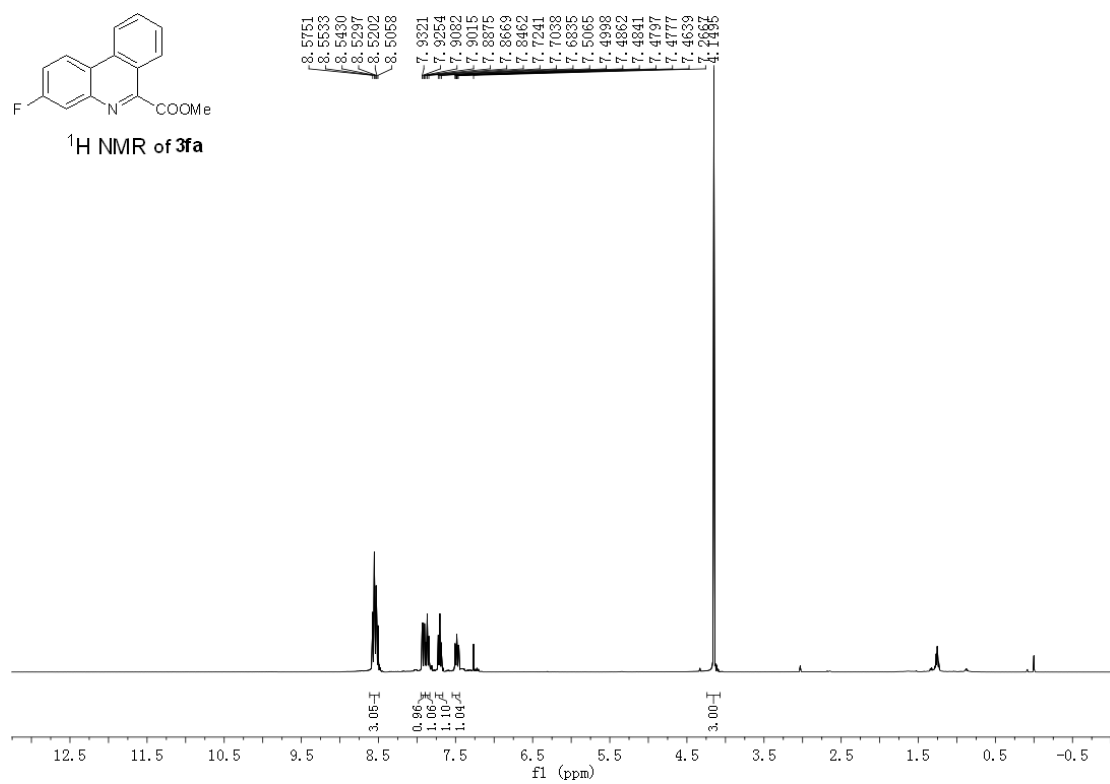

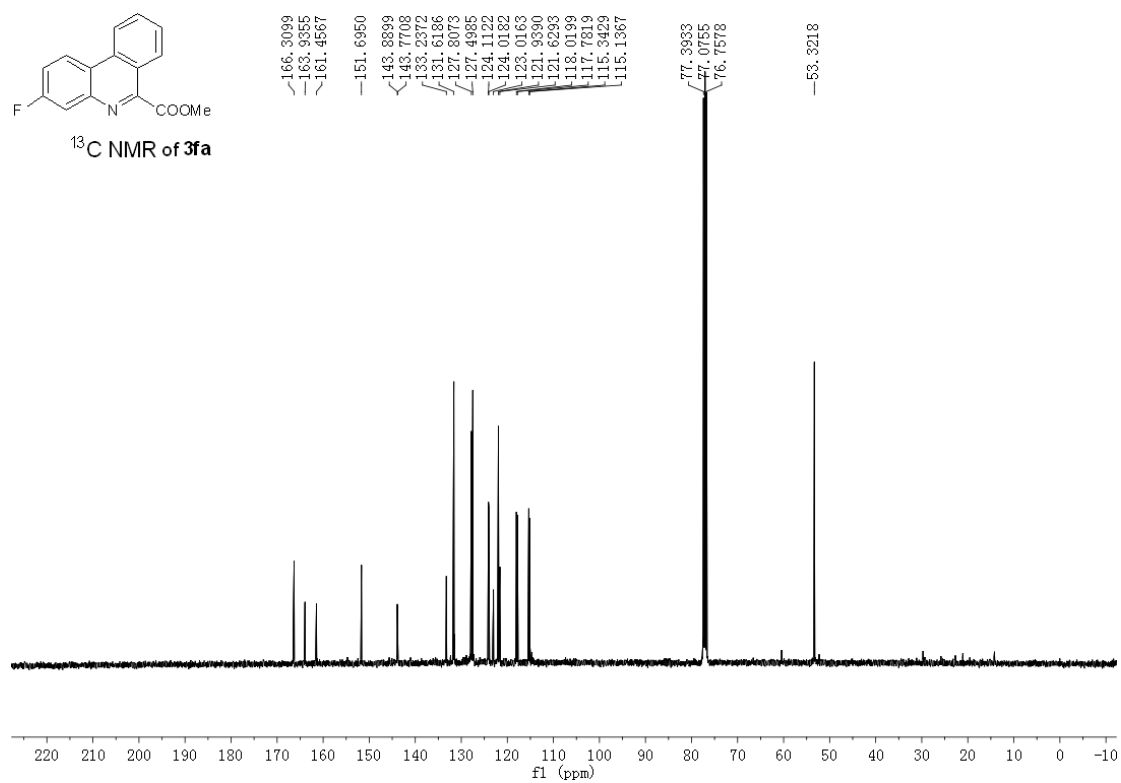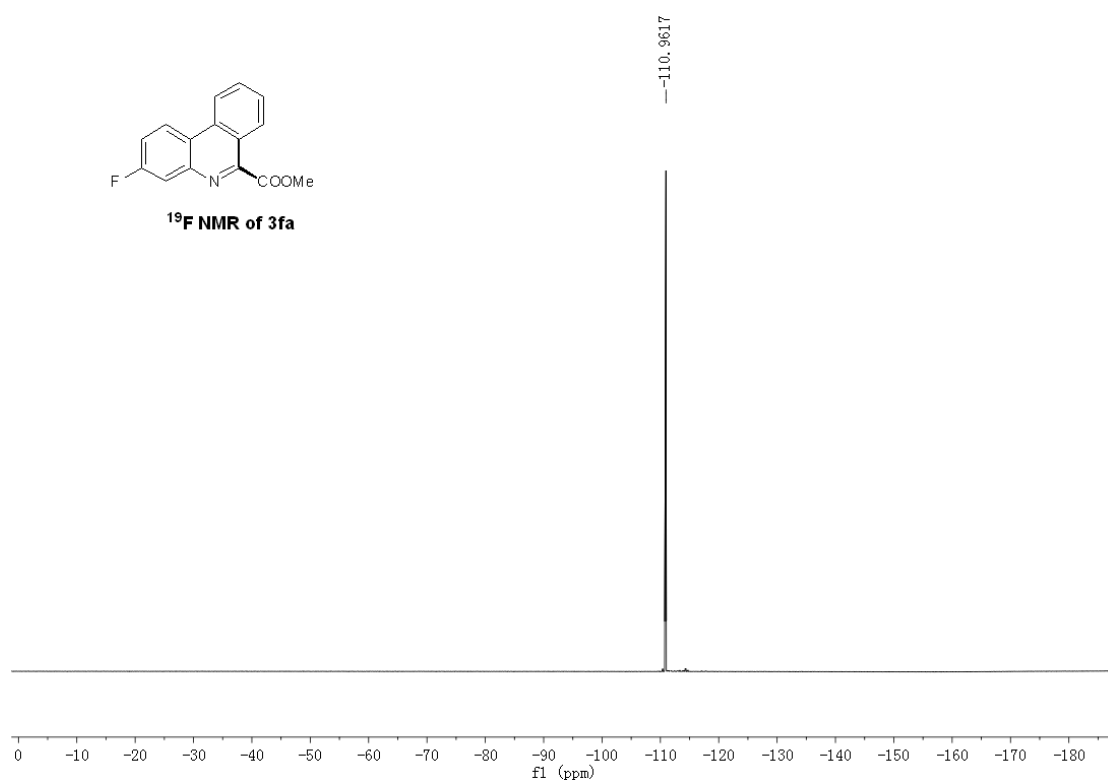



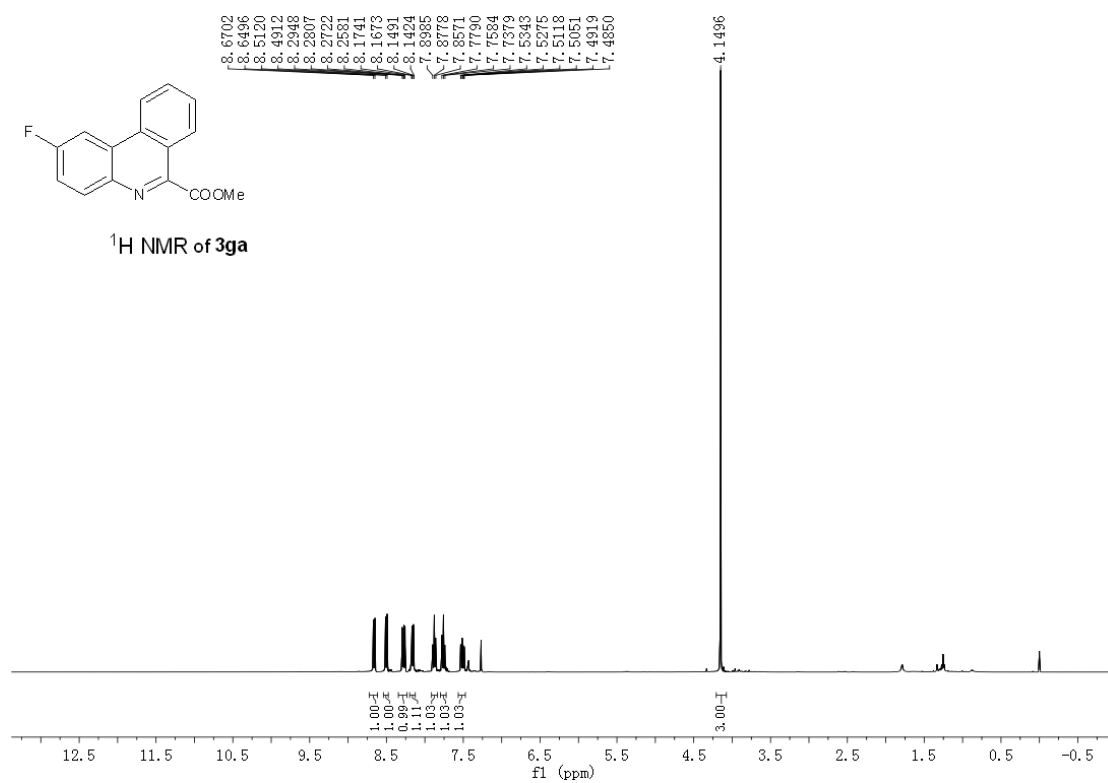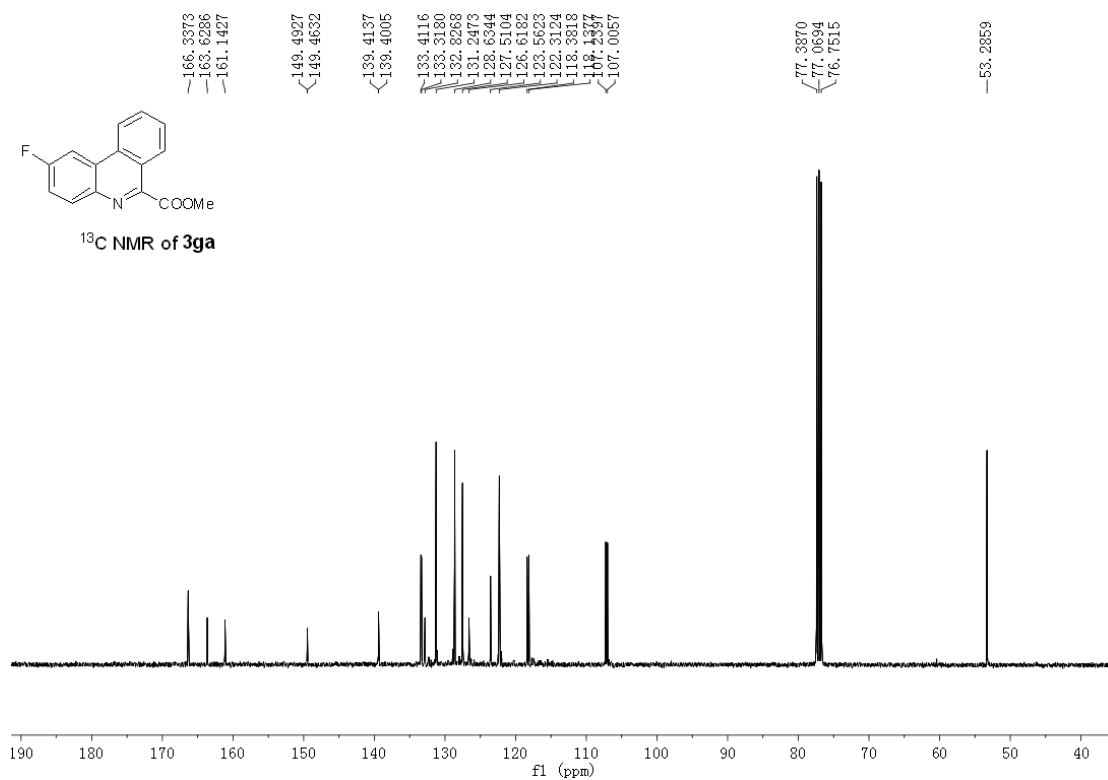

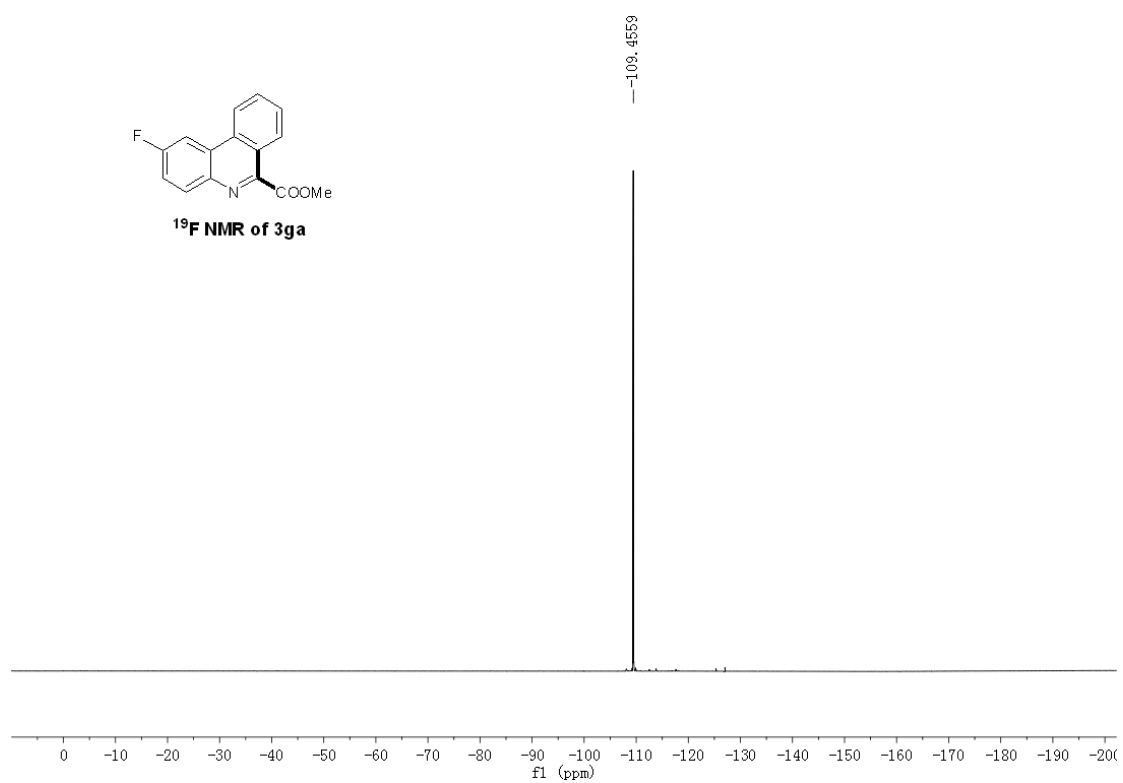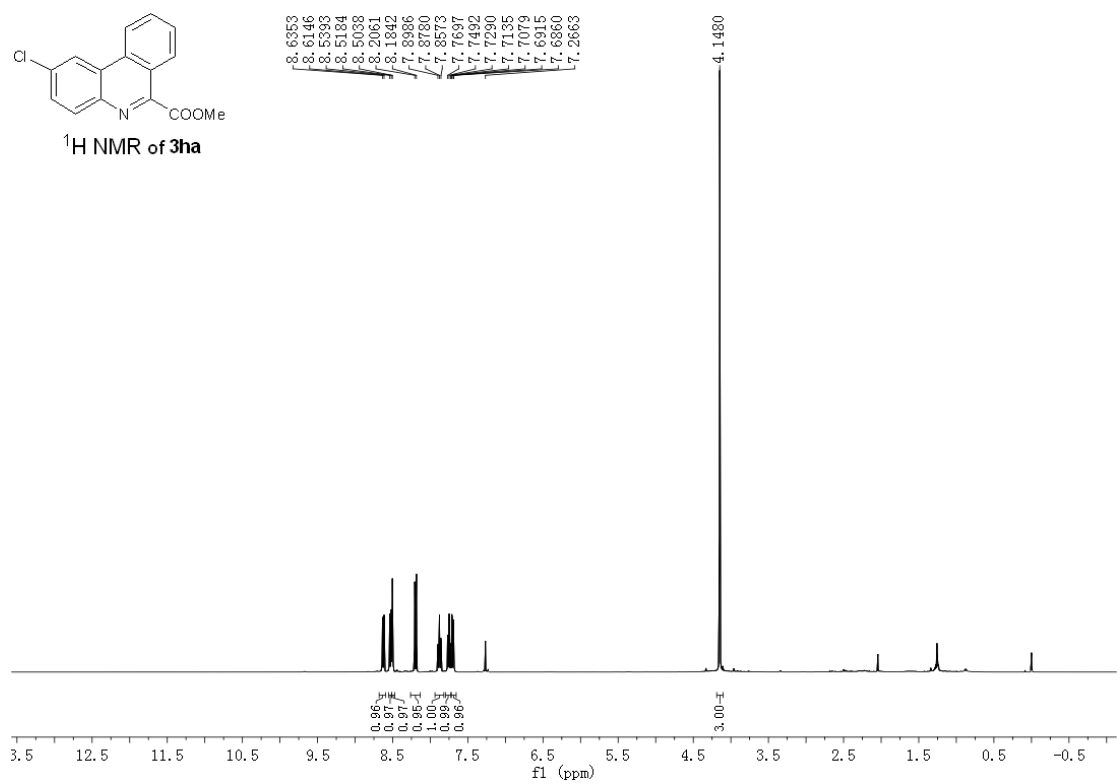

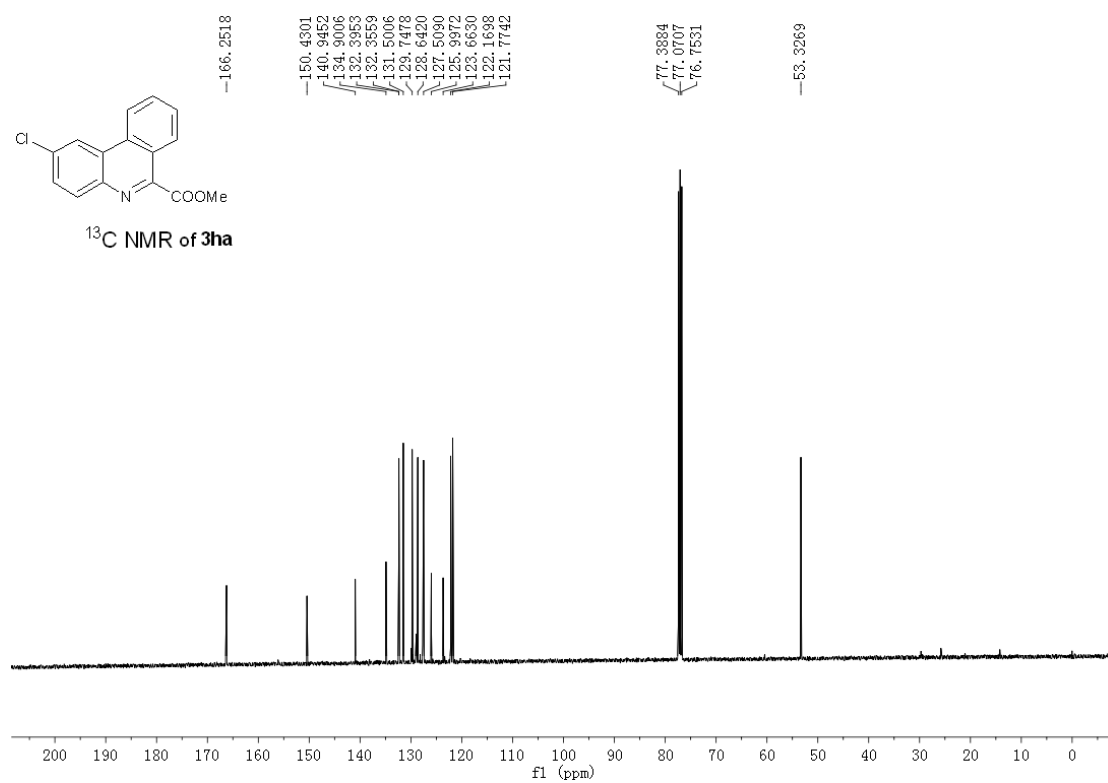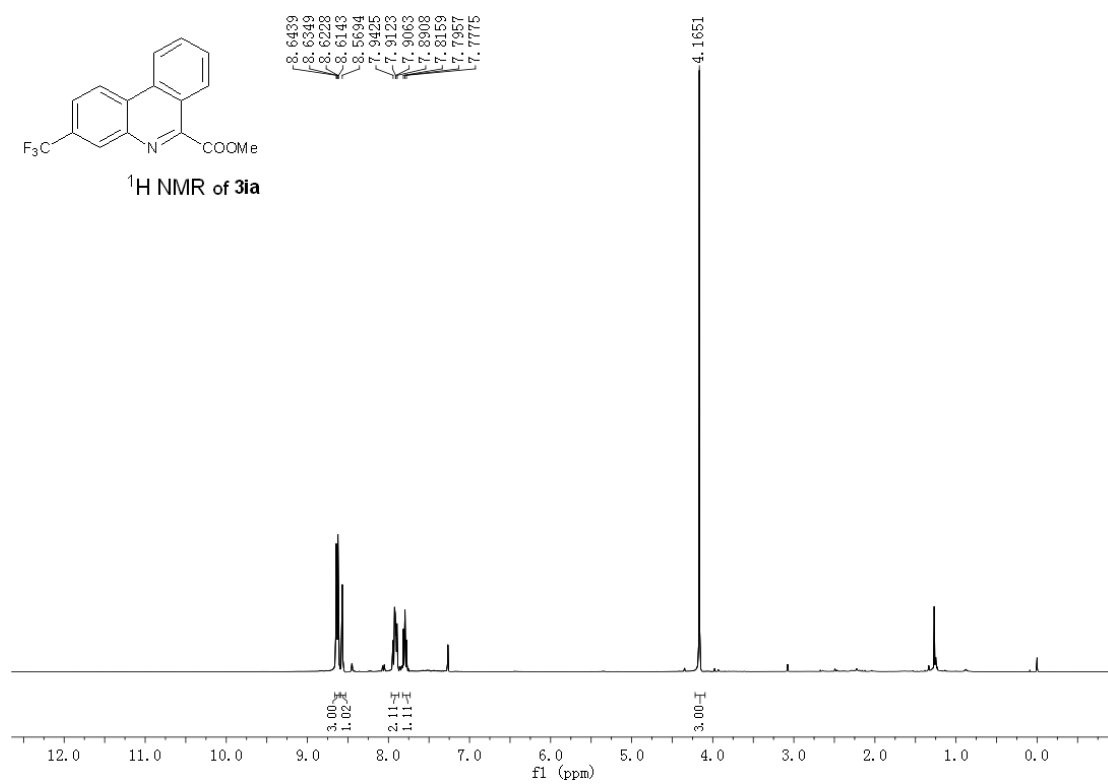

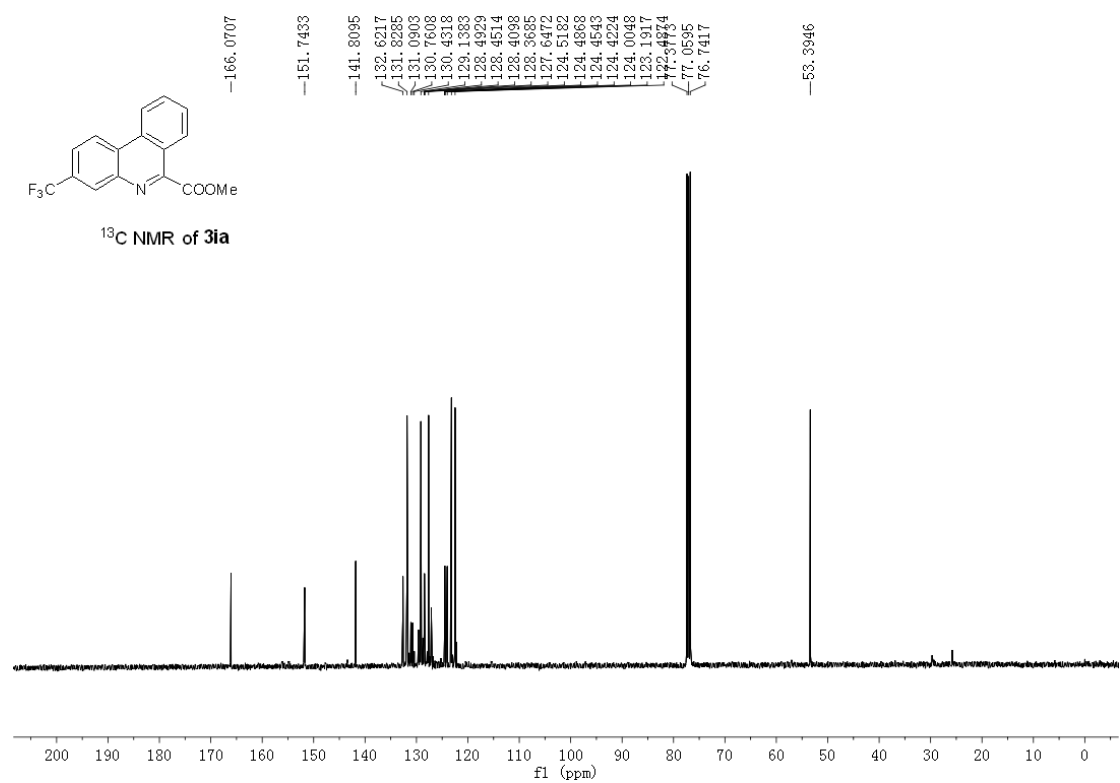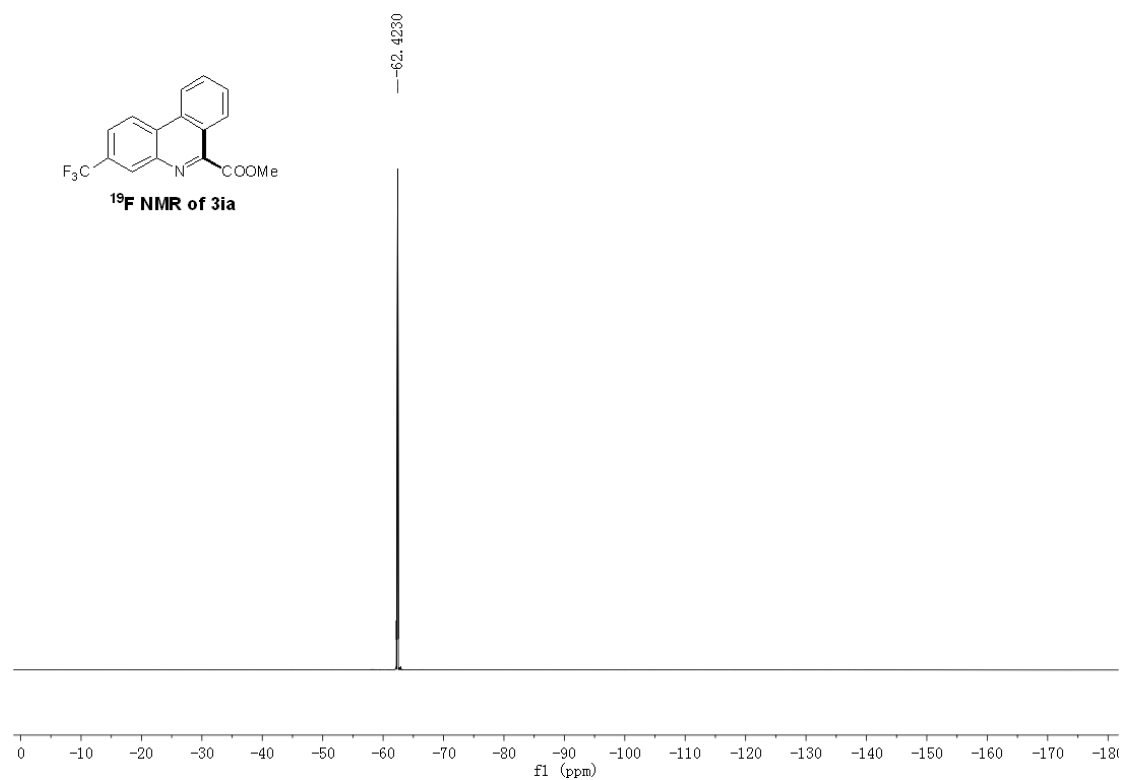

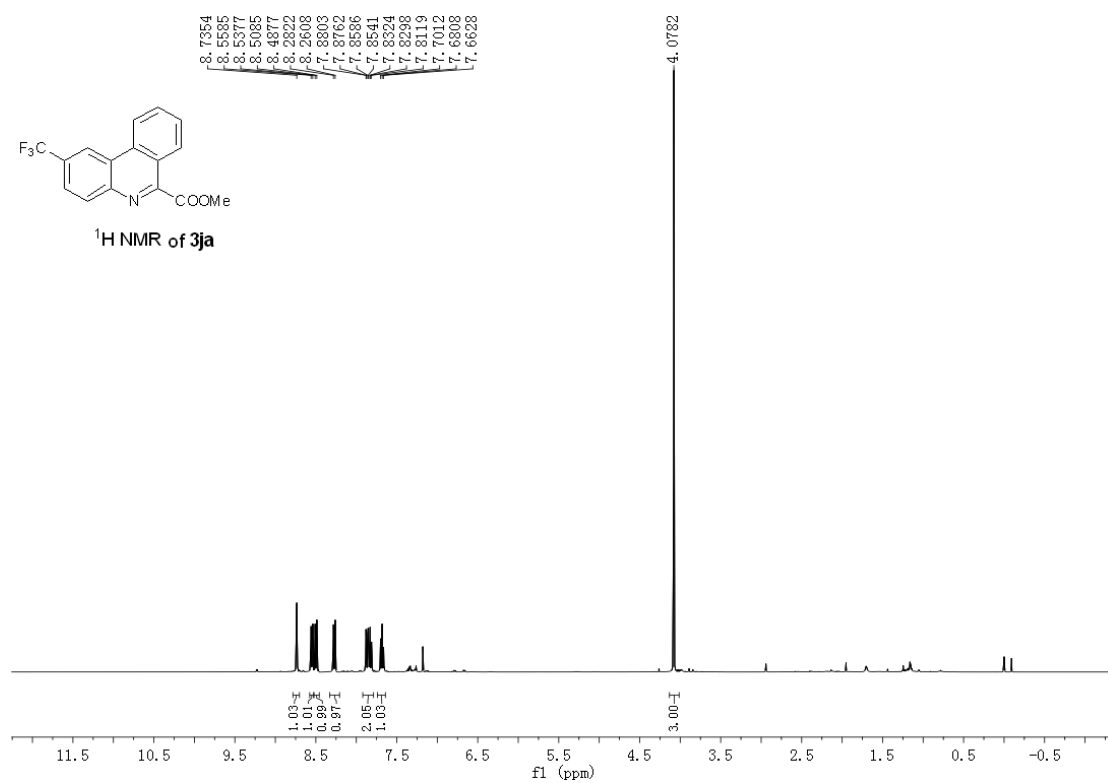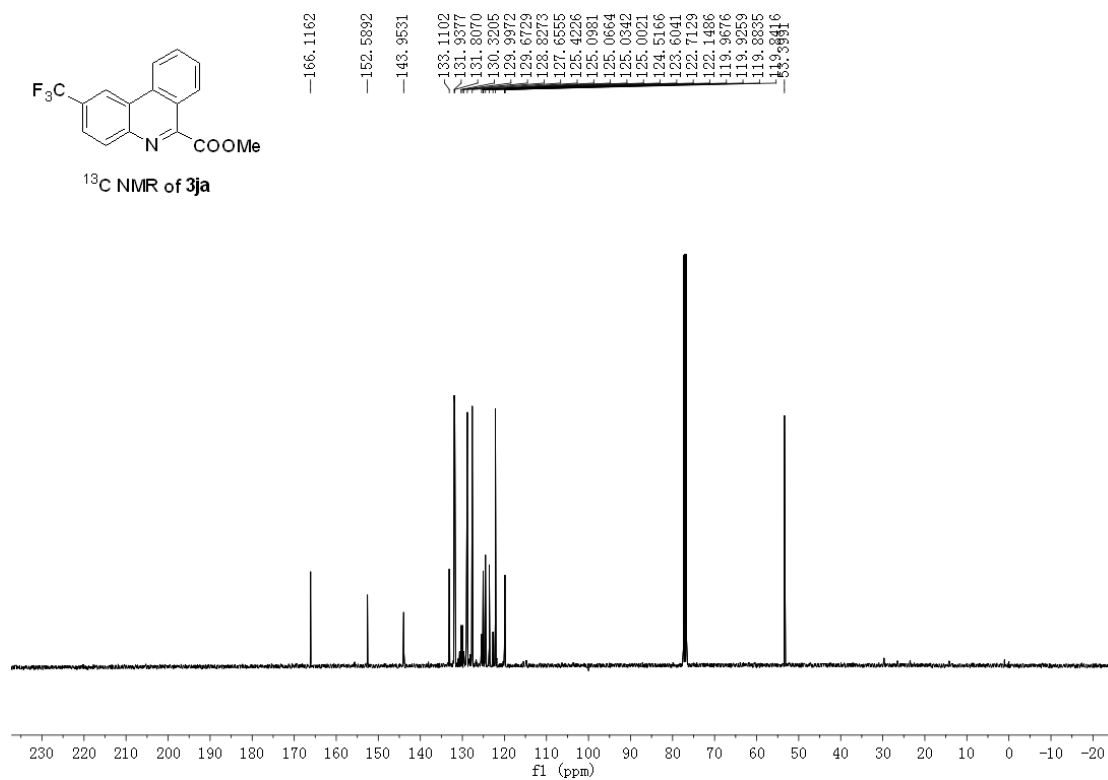

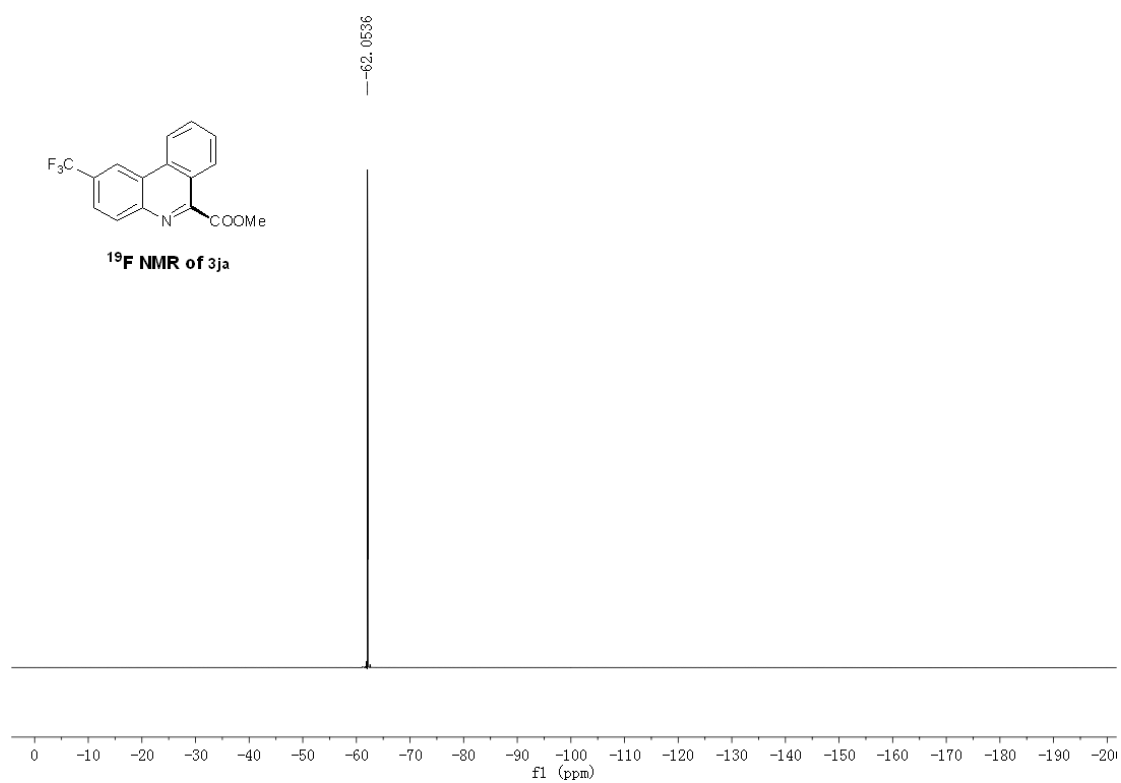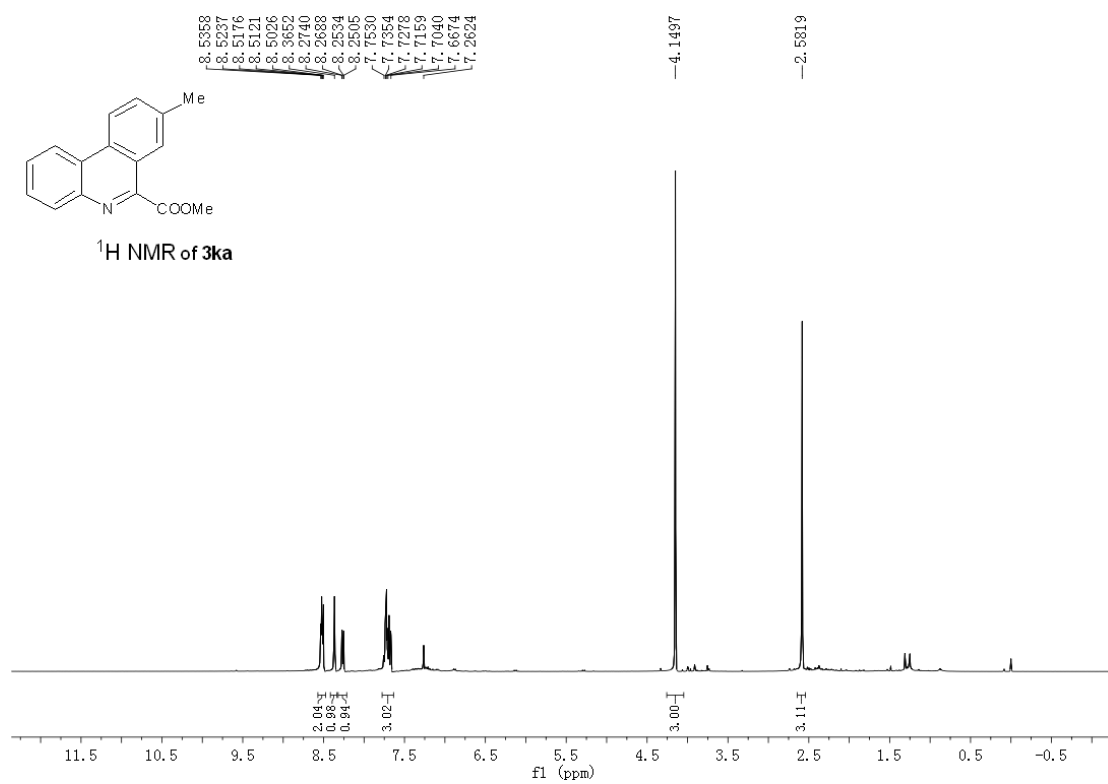

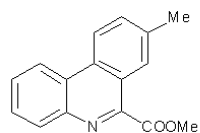

$^{13}\text{C}$  NMR of **3ka**

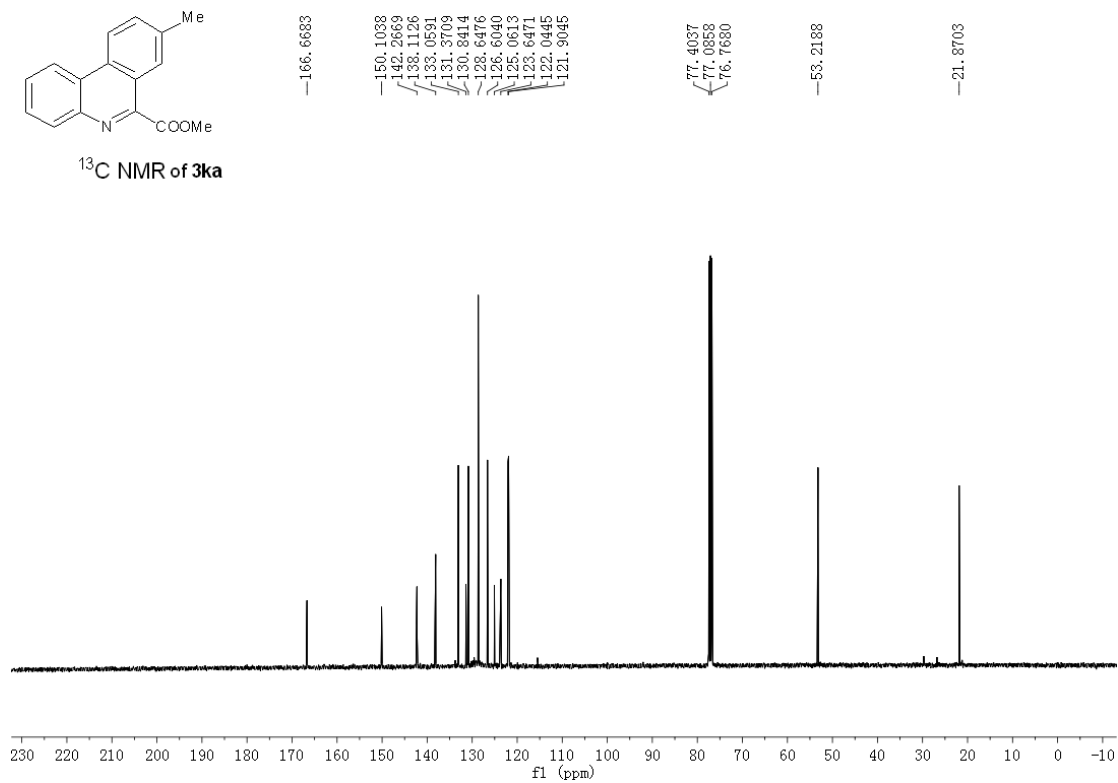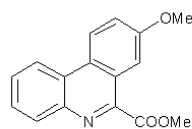

$^1\text{H}$  NMR of **3la**

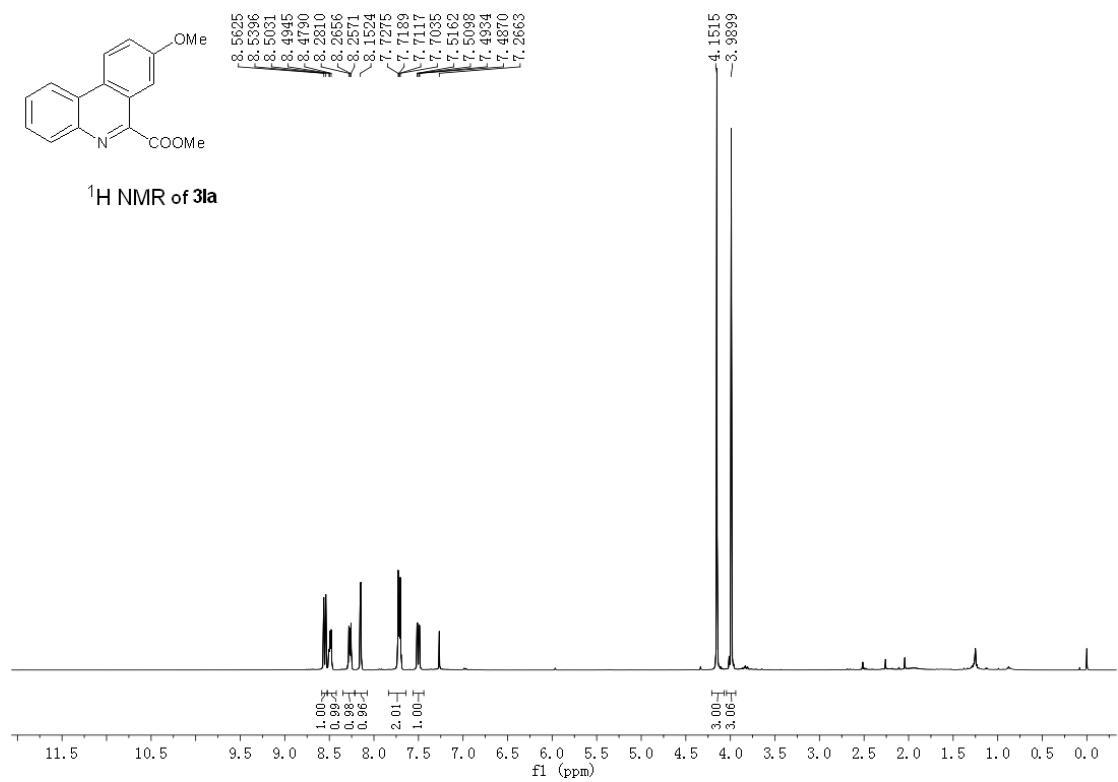

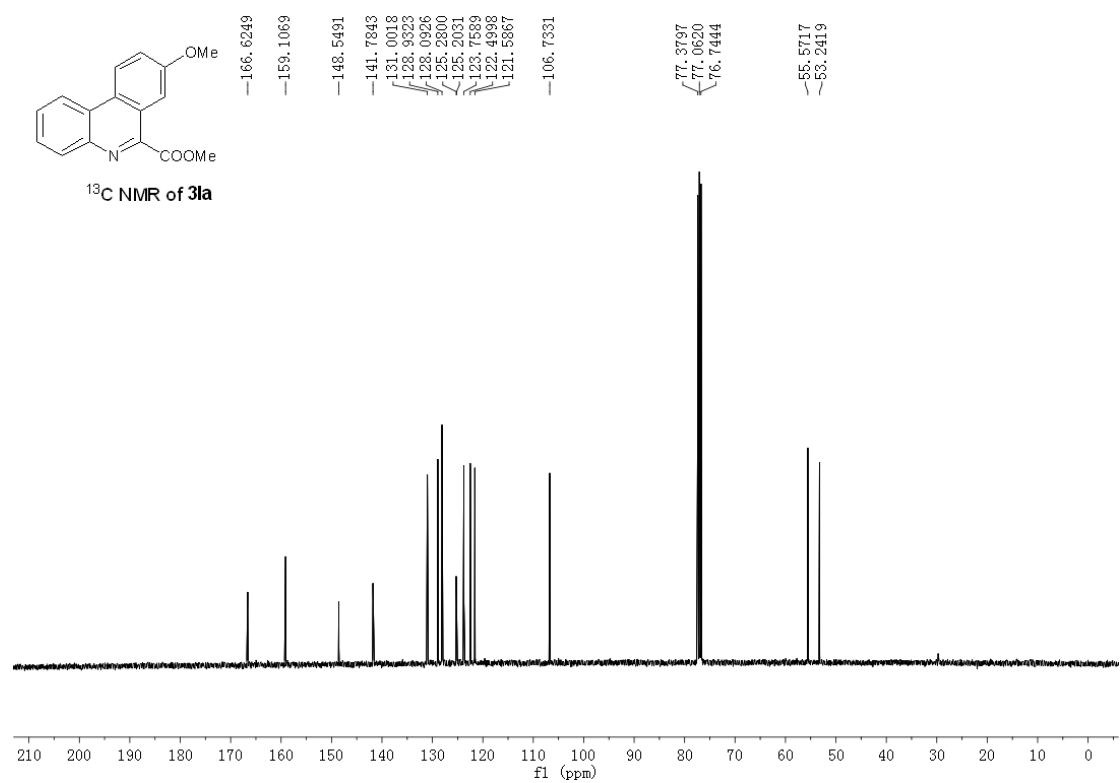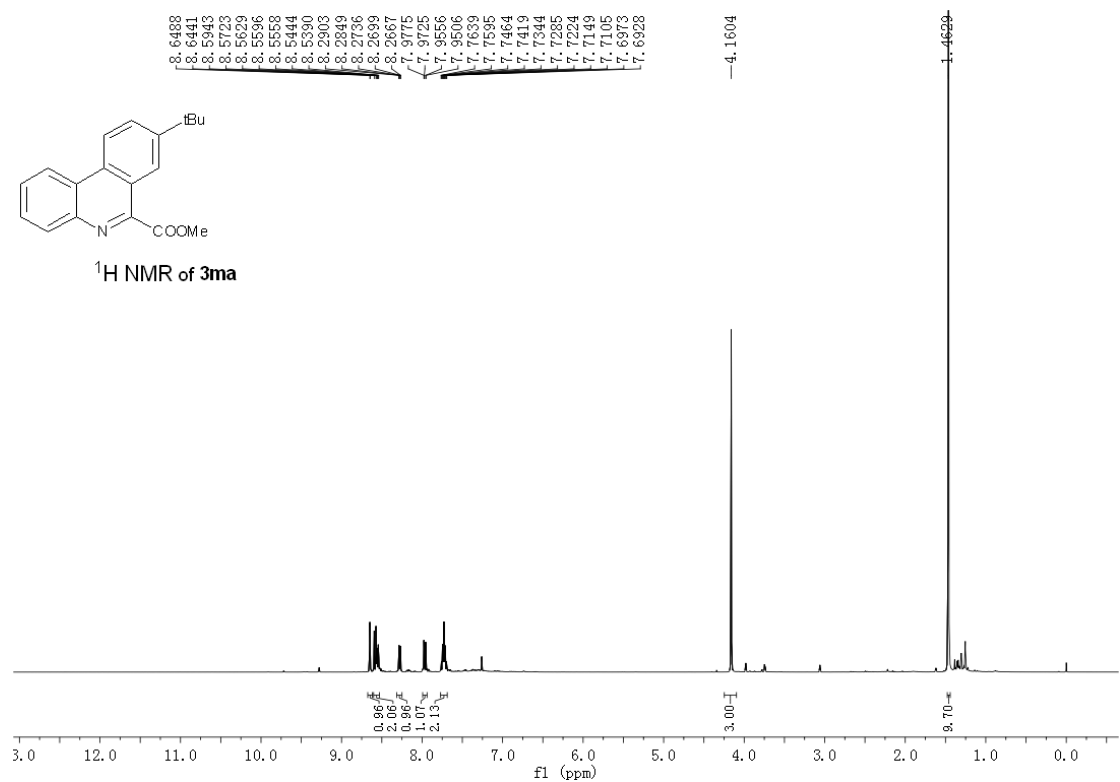



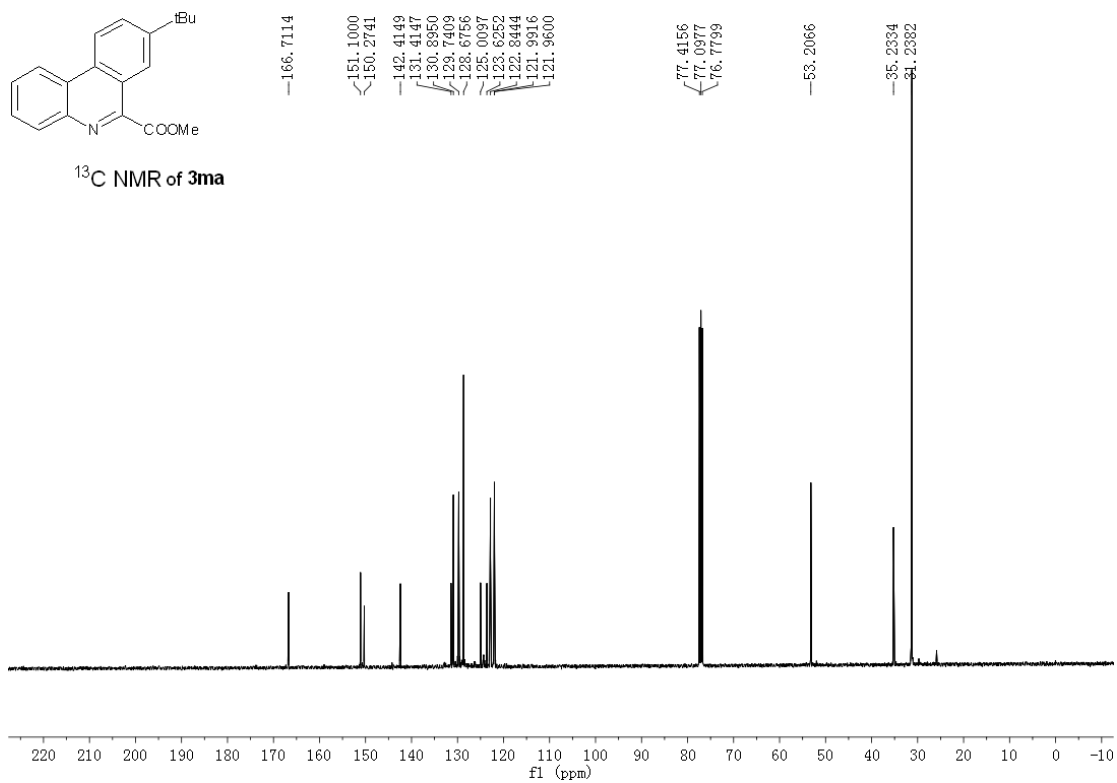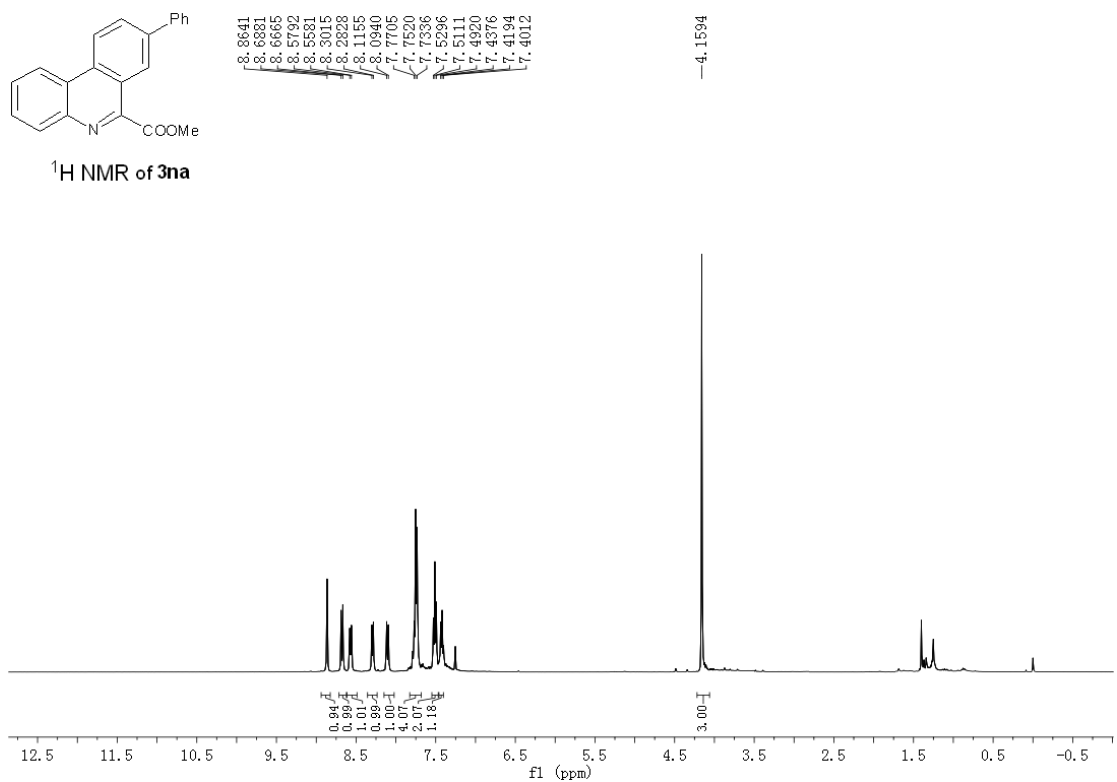

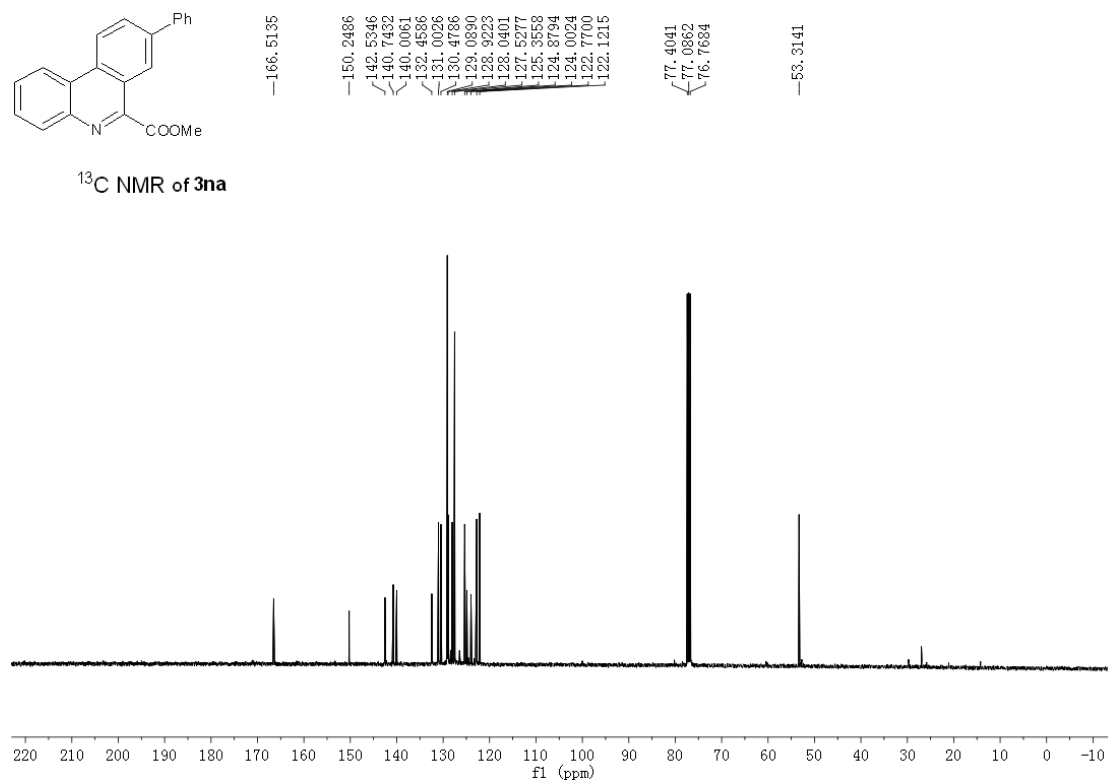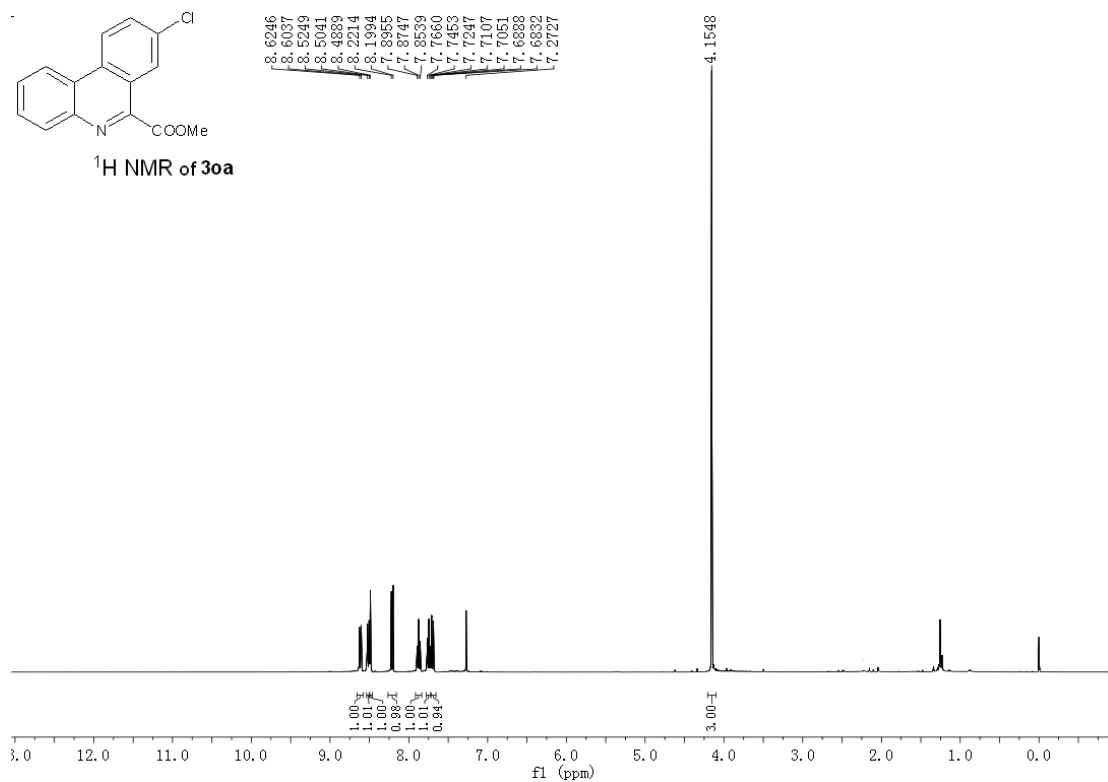

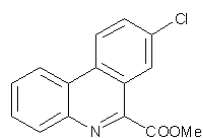

<sup>13</sup>C NMR of 30a

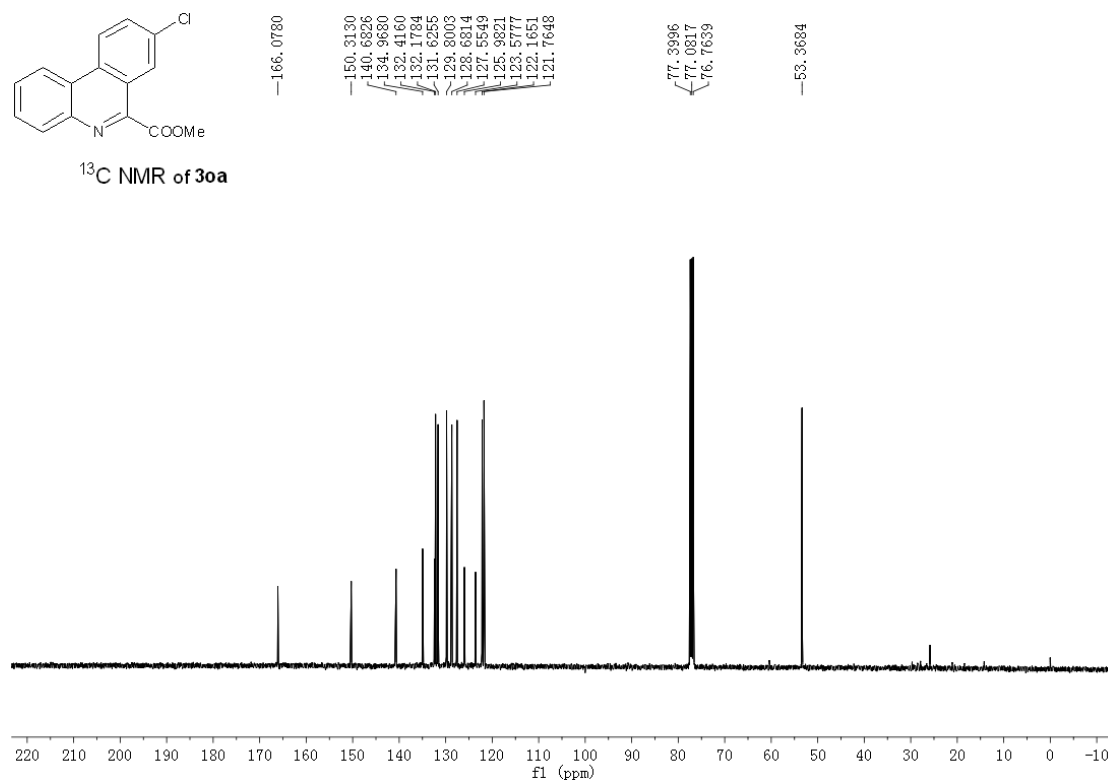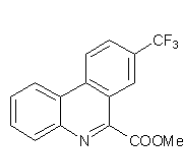

<sup>1</sup>H NMR of 3pa

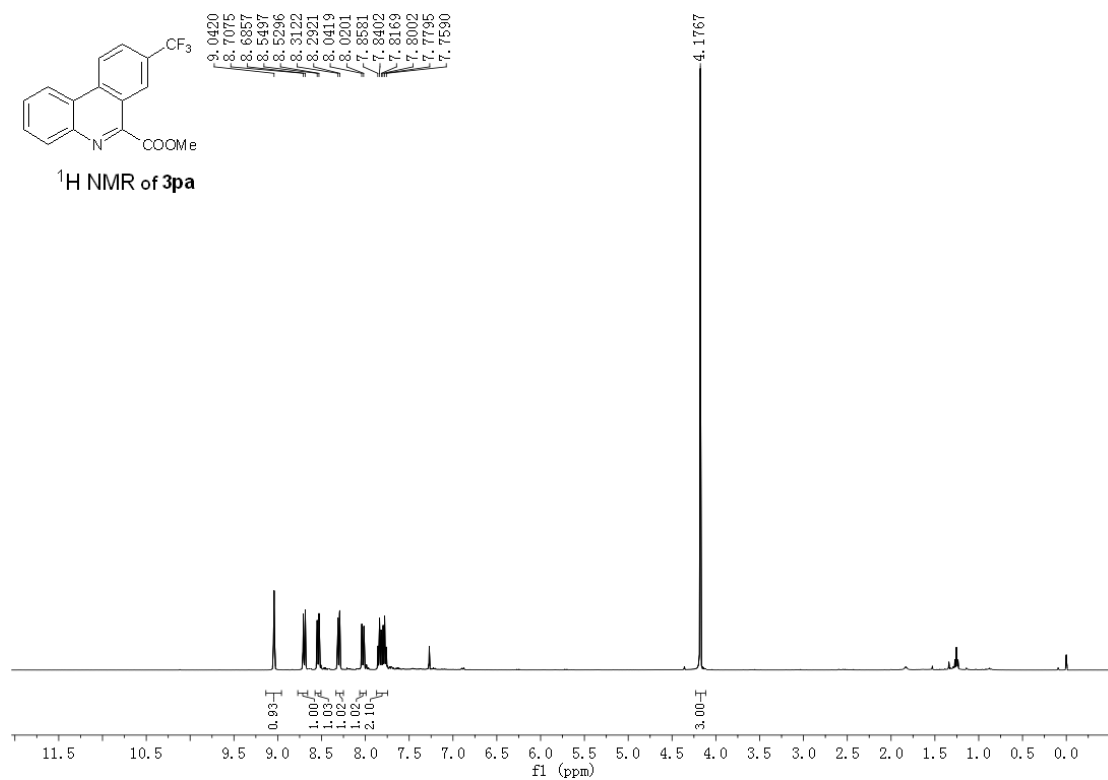

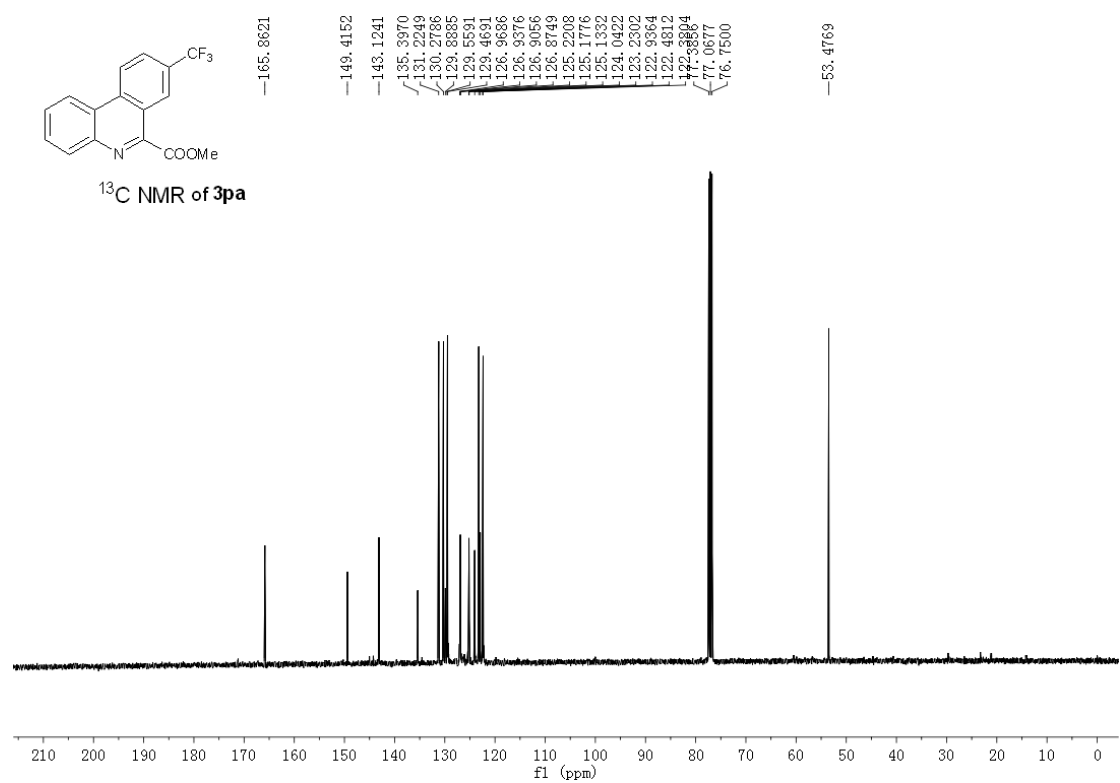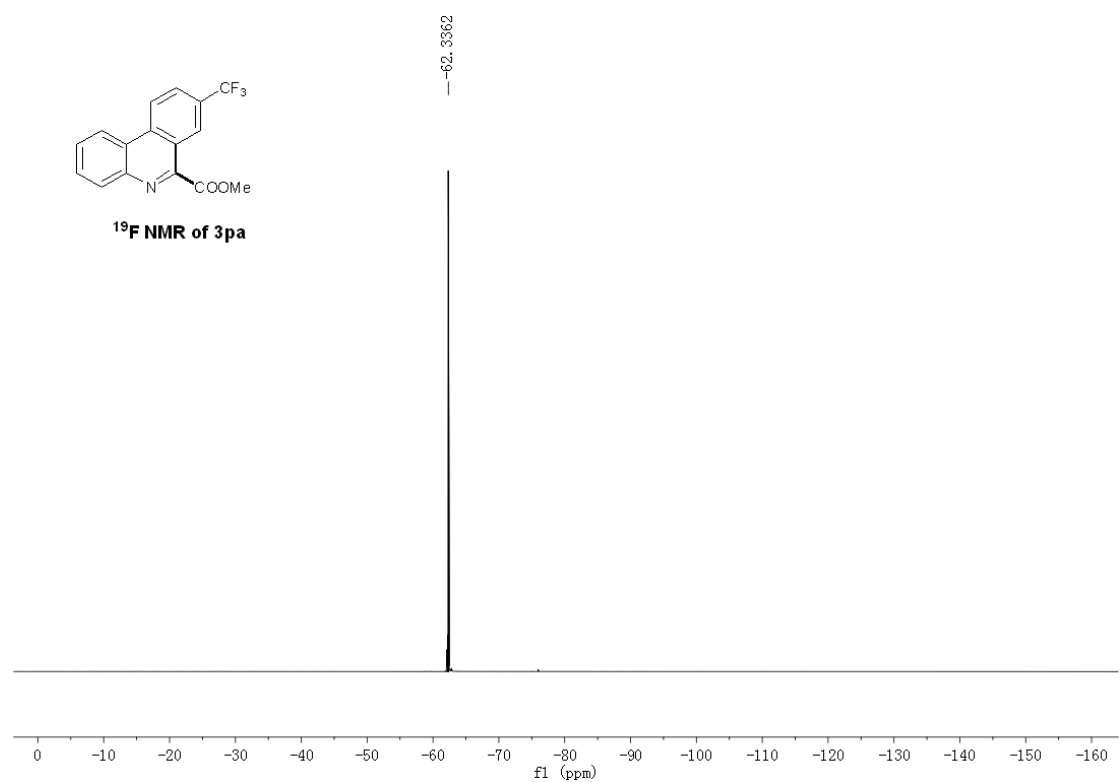

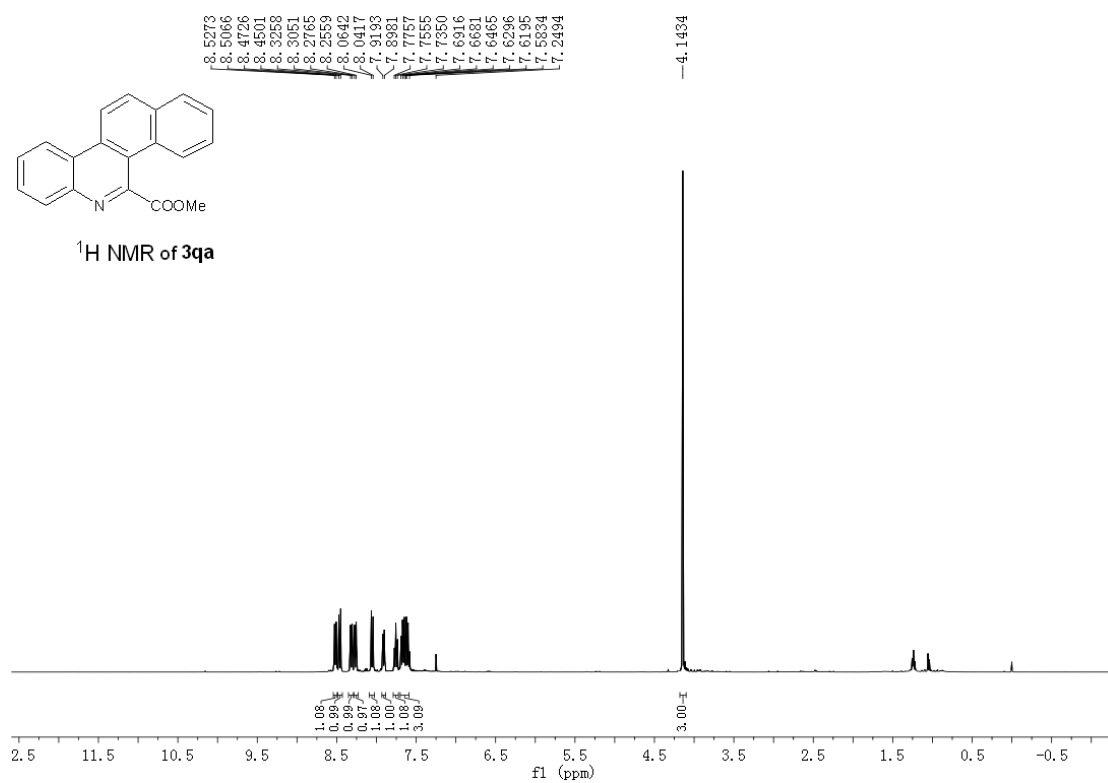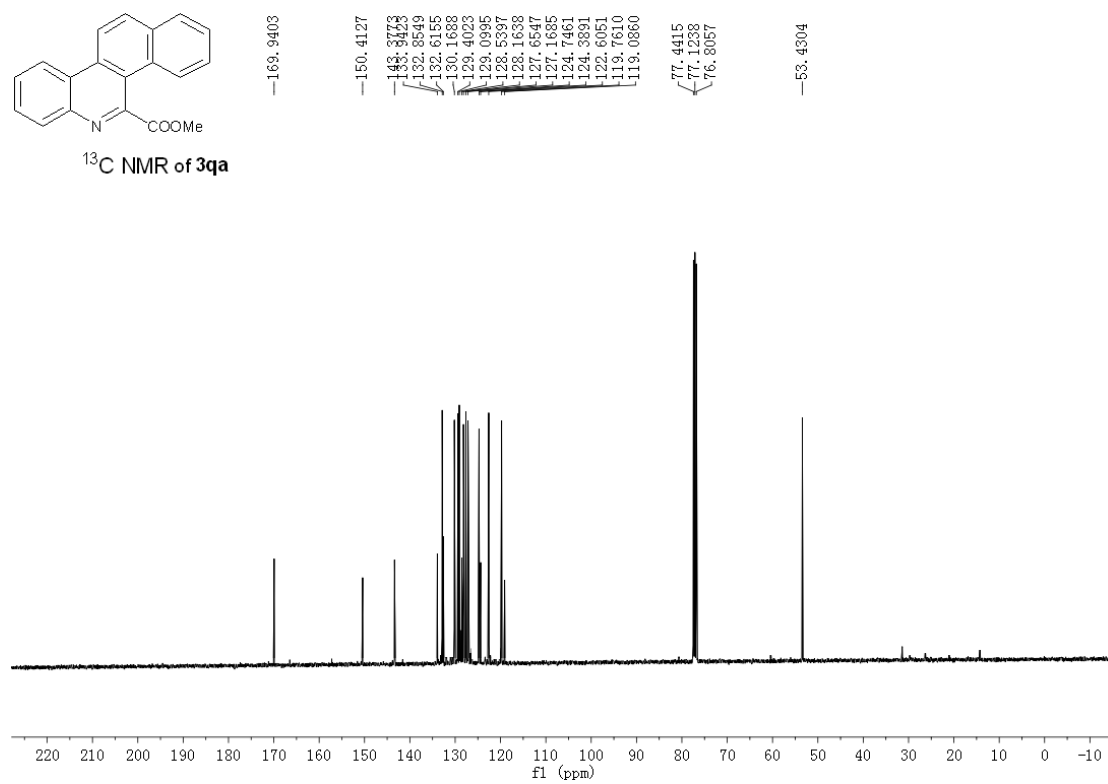

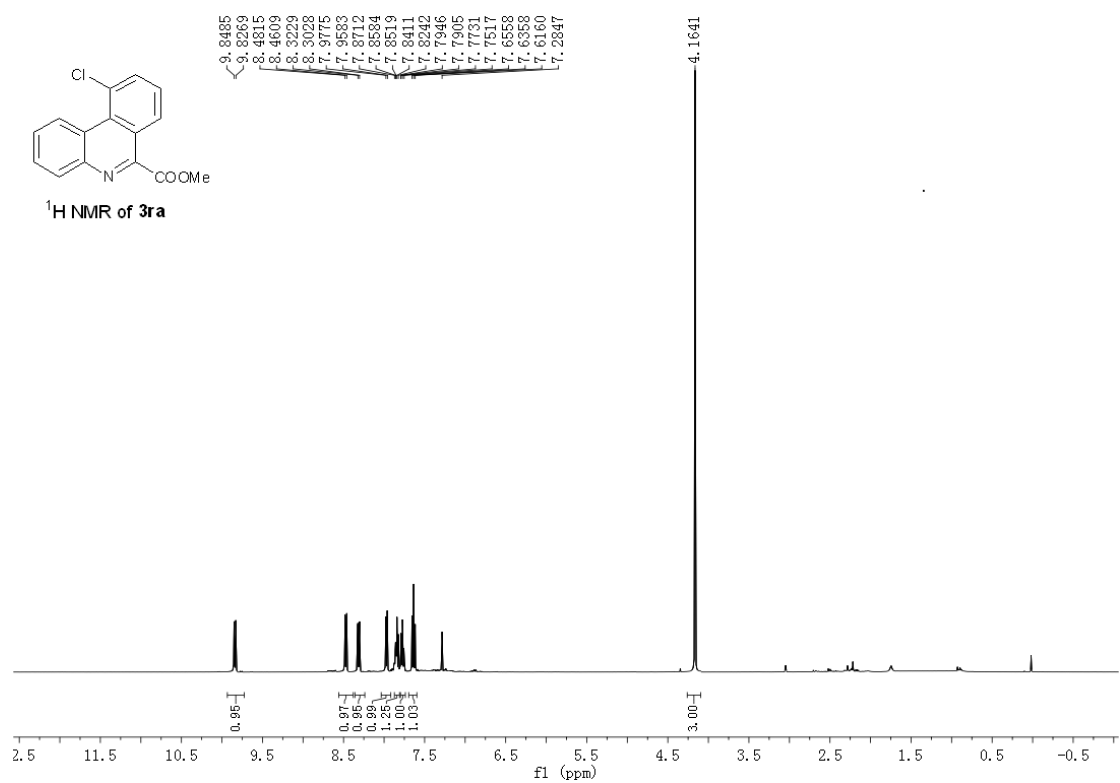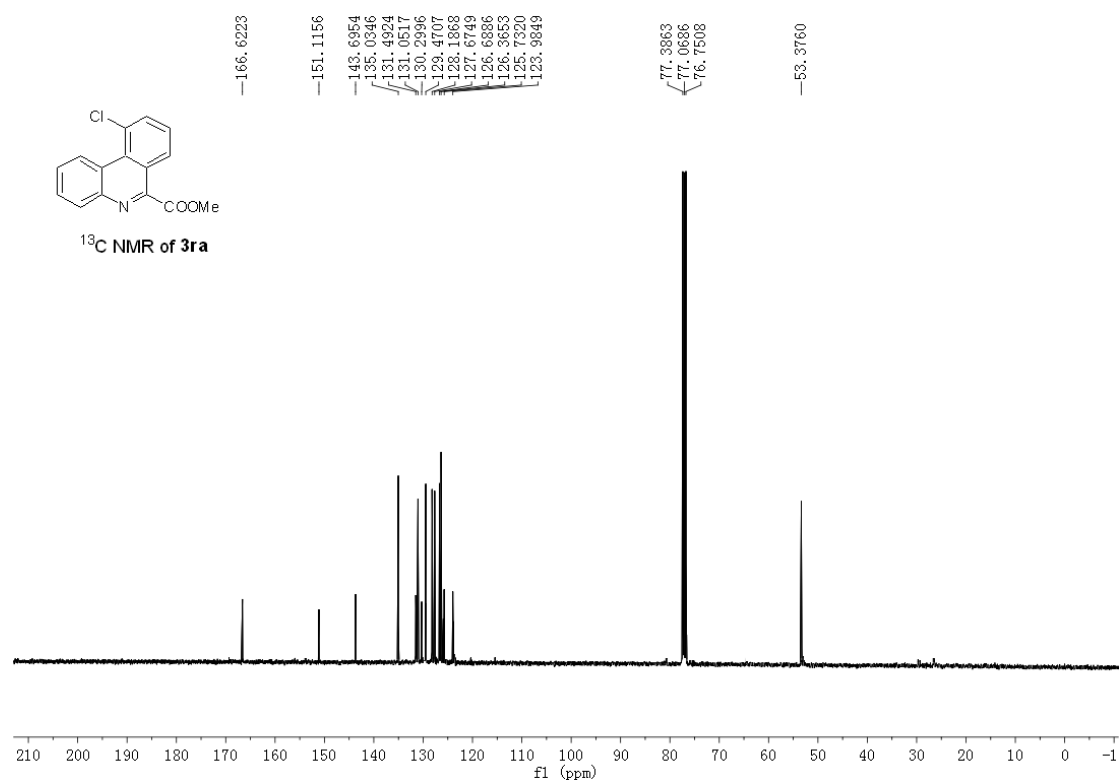

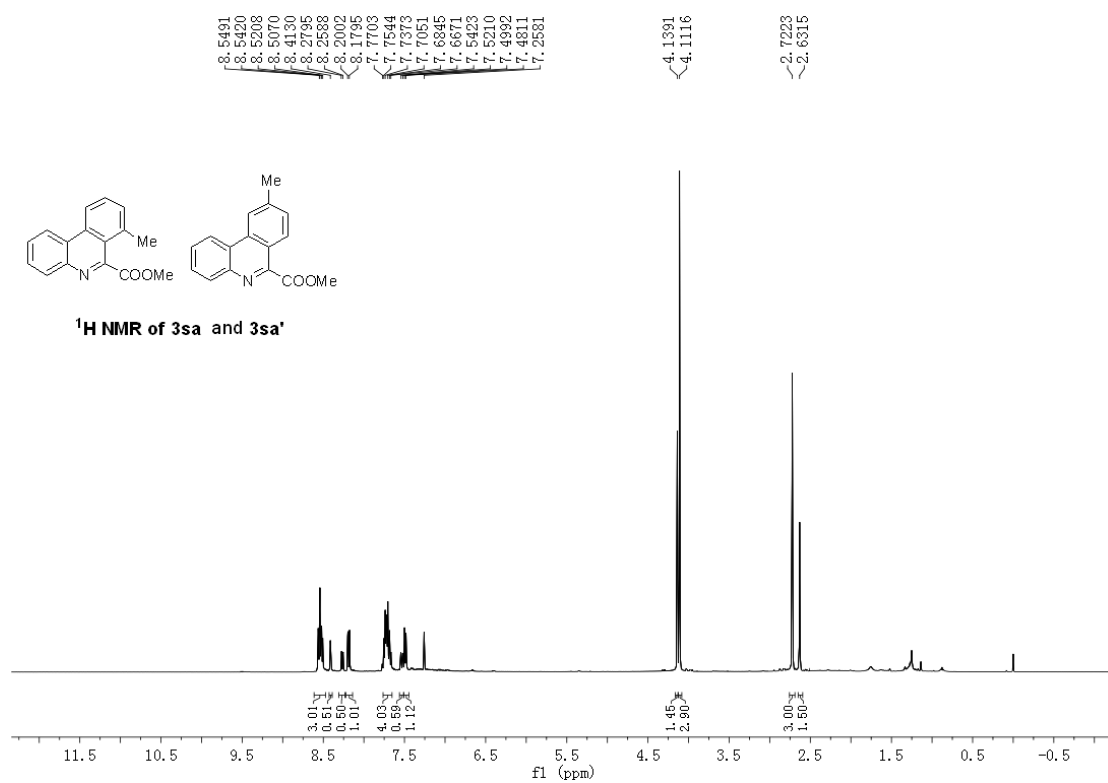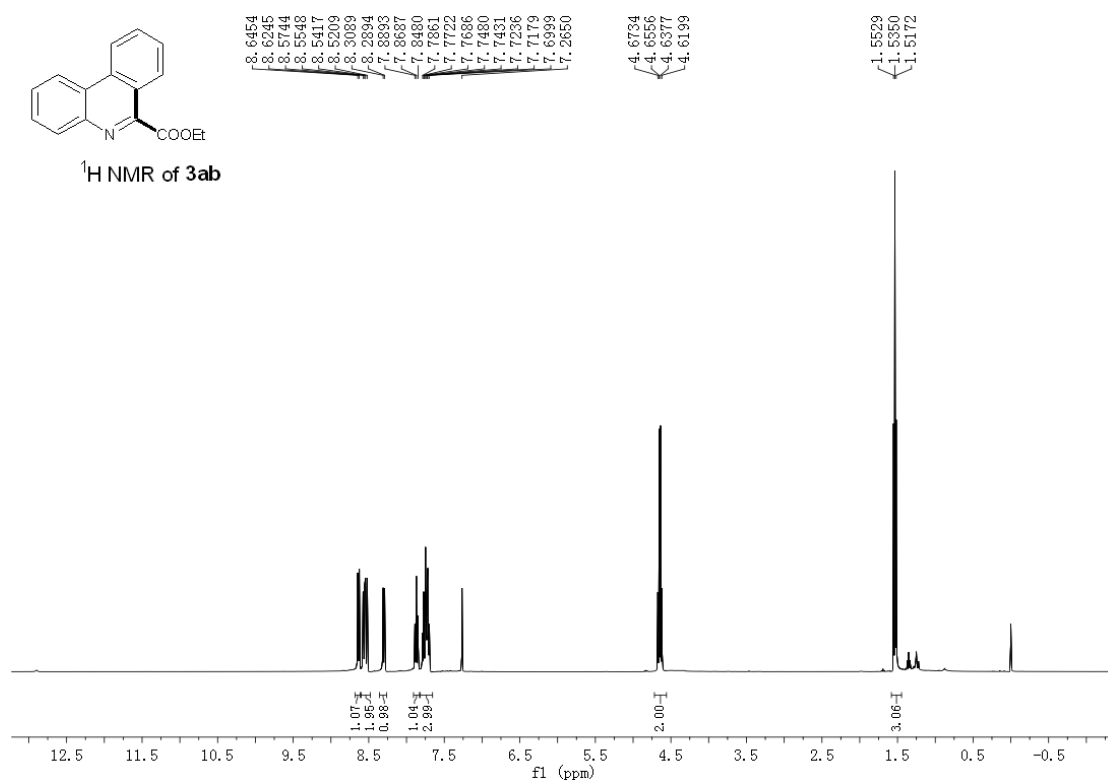

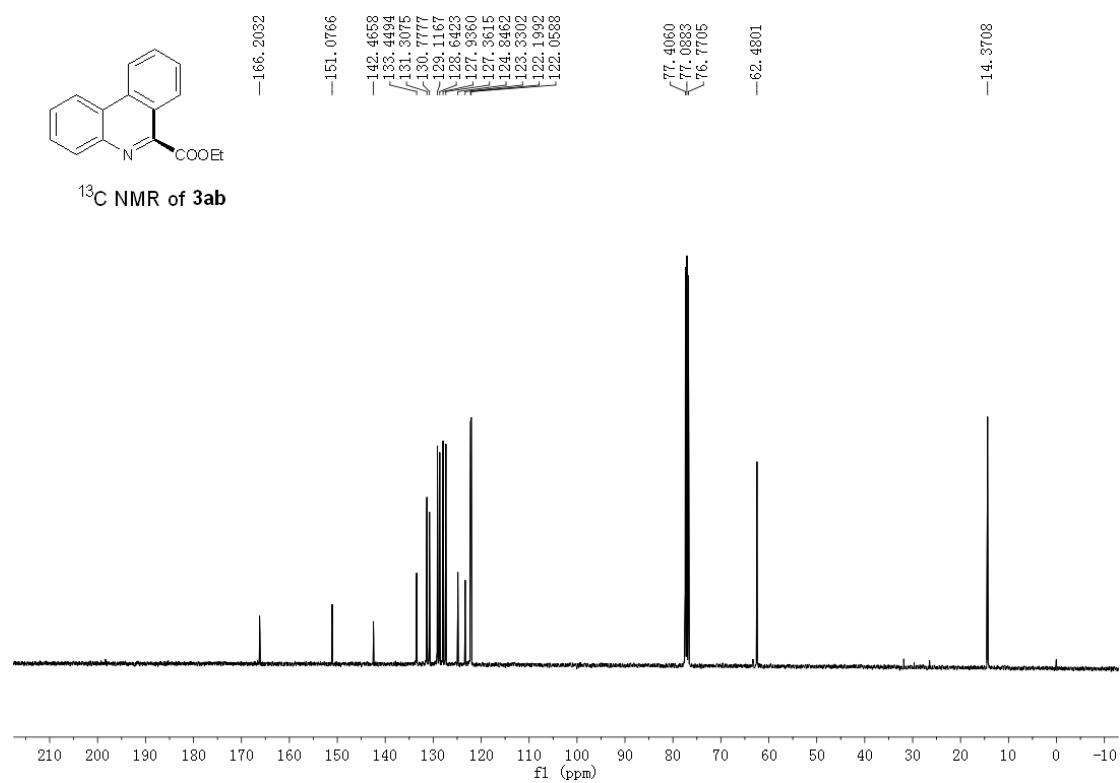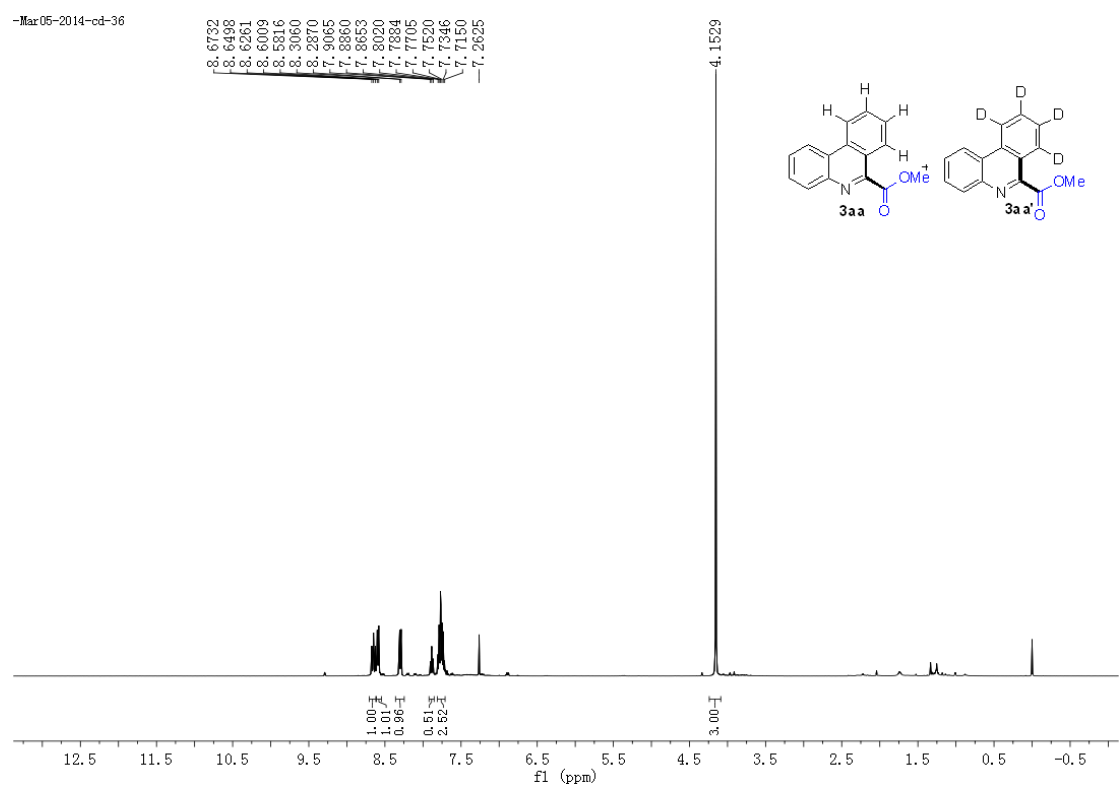

Supplement: Supplementary file 1 [file 3921943]
